# Supplementary material for: Multidisciplinary investigation links backward-speech trait and working memory through genetic mutation
Source: PubMed Central journal article supplement (PMC4738289; doi:10.1038/srep20369), 2016-02-03
Supplement: srep20369-s7.pdf [file srep20369-s7.pdf]

## **Multidisciplinary investigation links backward-speech trait and working memory through genetic mutation**

**Stefan Prekovic<sup>a,\*,#</sup>, Dusica Filipović Đurđević<sup>b,c,#</sup>, Gábor Csifcsák<sup>d</sup>, Olivera Sveljo<sup>e,f</sup>, Oliver Stojković<sup>g</sup>, Milica Janković<sup>g</sup>, Katarina Koprivsek<sup>e,h</sup>, Laura E Covill<sup>i</sup>, Milos Lucić<sup>e,f</sup>, Thomas Van den Broeck<sup>a</sup>, Christine Helsen<sup>a</sup>, Fabiola Ceroni<sup>i</sup>, Frank Claessens<sup>a</sup> and Dianne F Newbury<sup>i\*</sup>**

<sup>a</sup>Department of Cellular and Molecular Medicine, Faculty of Medicine, KU Leuven, Leuven, Belgium

<sup>b</sup>Department of Psychology, Faculty of Philosophy, University of Novi Sad, Novi Sad, Serbia

<sup>c</sup>Laboratory for Experimental Psychology, Faculty of Philosophy, University of Belgrade, Belgrade, Serbia

<sup>d</sup>Institute of Psychology, Faculty of Arts, University of Szeged, Szeged, Hungary

<sup>e</sup>Diagnostic Imaging Center, Oncology Institute of Vojvodina, Sremska Kamenica, Serbia

<sup>f</sup>Faculty of Technical Sciences, University of Novi Sad, Novi Sad, Serbia

<sup>g</sup>Faculty of Medicine, University of Belgrade, Belgrade, Serbia

<sup>h</sup>Medical Faculty, University of Novi Sad, Novi Sad, Serbia

<sup>i</sup>Wellcome Trust Center for Human Genetics, University of Oxford, Oxford, UK. OX3 7BN

**\*corresponding authors**

**#equal contribution**

**Corresponding author details:**

**Stefan Prekovic**

Department of Molecular and Cellular Medicine

Faculty of Medicine

KU Leuven

Herestraat 49 bus 901

+32 1637 90 02

Belgium

3000 Leuven

[stefan.prekovic@med.kuleuven.be](mailto:stefan.prekovic@med.kuleuven.be)

**Dianne Newbury**

Wellcome Trust Centre for Human Genetics

Roosevelt Drive

Headington

Oxford.

OX3 7BN.

+44 1865 287652

[dianne@well.ox.ac.uk](mailto:dianne@well.ox.ac.uk)

**Key words: speech, language, working memory, *RIC3*, *ZBED5*, *RIPK1***

## **SUPPLEMENTARY INFORMATION**

### **Supplementary files accompanying this manuscript.**

#### **Audio files**

**Audio file 1** Audio file demonstrating the proband's reversal of words. The tester gives a word and the proband responds with the reversed word.

**Audio file 2** Audio file demonstrating the father's reversal of words. The tester gives a word and the father responds with the reversed word.

**Audio file 3** Audio file demonstrating the proband's reversal of sentences. The tester gives a sentence and the proband responds with the reversed sentence.

**Audio file 4** Audio file demonstrating the father's reversal of sentences. The tester gives a sentence and the father responds with the reversed sentence

**Audio file 5** Audio file demonstrating the proband's spontaneous backward-speech. The proband describes her favorite food.

**Audio file 6** Audio file demonstrating the father's spontaneous backward-speech. The father describes his favorite food.

#### **Figures**

**Figure S1. Auditory word reversal task:** proband's performance for forward-words, backward-words, forward-pseudo-words and backward-pseudo-words.

**Figure S2. Proband's scores for Stroop and Sternberg task.** Accuracy is shown in percentages (%). Response time shown in milliseconds (ms). Values represent median+IQR.

**Figure S3. EEG waveforms and scalp maps of the proband.** A) Effects of congruence and reversal in the semantic priming and syntactic violation tasks at electrode Cz. The N400 waveform can be observed in both tasks and all conditions, being larger for backward- vs. forward- and incongruent- vs. congruent-stimuli. B) Backward- vs. forward-differential EEG activity during the retention period of the Sternberg task. Increased frontal negativity was recorded for backward-written words.

**Figure S4. Flow diagram showing the filtering of the exome data.**

**Figure S5. Validation by Sanger sequencing.**

**Figure S6. UBC is a close interacting partner of RIC3 and RIPK1. And it might also be linked to ZBED5 via EPS15 and CDKN1B.**

**Figure S7. Expression data from Allen Brain Atlas of 6 subjects.** FL - frontal lobe; Ins – insul; CG - cingulate gyrus; HF - hippocampal formation; PG - parahippocampal gyrus; OL - occipital

lobe; PL - parietal lobe; TL - temporal lobe; Amg – amygdala; BF - basal forebrain; GP - globus pallidus; Str – striatum; Cl – claustrum; ET – epithalamus; Hy – hypothalamus; SbT – subthalamus; DT - dorsal thalamus; VT- ventral thalamus; ME – mesencephalon; CC - cerebellar cortex; CN - cerebellar nuclei; BP - basal part of pons; PT - pontine tegmentum; MY – myelencephalon; WM - white matter; and SS - sulci & spaces.

**Figure S8. fMRI maps of the proband for forward “speech”.** Spatial smoothing Full width at half maximum (FWHM)=4mm, corrected cluster threshold  $Z>2.3$ , corrected cluster significance  $P=0.05$ ) registered on T1 high resolution subject brain images

**Figure S9. fMRI maps of the proband for backward-“speech”.** Spatial smoothing Full width at half maximum (FWHM)=4mm, corrected cluster threshold  $Z>2.3$ , corrected cluster significance  $P=0.05$ ) registered on T1 high resolution subject brain images.

### **Tables**

**Table S1.** Details of all tests performed in the study.

**Table S2.** The proband and father were orally presented with 50 single word stimuli and instructed to reverse the word (as heard in Audio file 1 and 2, respectively). The errors are marked red and bold (proband: two errors; father: ten errors).

**Table S3.** The proband and father were orally presented with one sentence at the time and instructed to repeat the sentence backwards, in the way they usually do (as heard in Audio file 3 and 4 respectively). The instruction was kept neutral in order to capture the information on whether the order of words in the sentence was preserved or manipulated. The errors are marked red and bold (proband: one error; father: five errors).

**Table S4.** The proband and father were asked to talk about their favourite food while playing with language as they usually do. The errors are marked red and bold.

**Table S5.** Proband’s response and stimuli used in auditory word reversal task  
Due to size this table is provided as a stand-alone document.

**Table S6.** Lexical decision task reaction time of the proband and father.

**Table S7.** Error rates and processing latencies of the proband as observed in visual lexical decision task and auditory lexical decision task.

**Table S8.** Results of the analyses of errors and response latencies of the proband as observed in visual lexical decision task and auditory lexical decision task .

**Table S9.** Coefficients from logistic regression model of control group’s (n=6) accuracy in Dual task.

**Table S10.** Coefficients from logistic regression model for the accuracy of the proband in Dual task.

**Table S11.** Proband: fMRI coordinates for areas active in forward- or backward-condition.

**Table S12.** Proband: fMRI coordinates for areas highly active only in forward- or backward-condition.

**Table S13.** Exome sequencing metrics

**Table S14.** Predicted effects of shared variants of putative significance that validated.

**Table S15.** UbPred Prediction

**Table S16.** Ubiquitination burden analysis

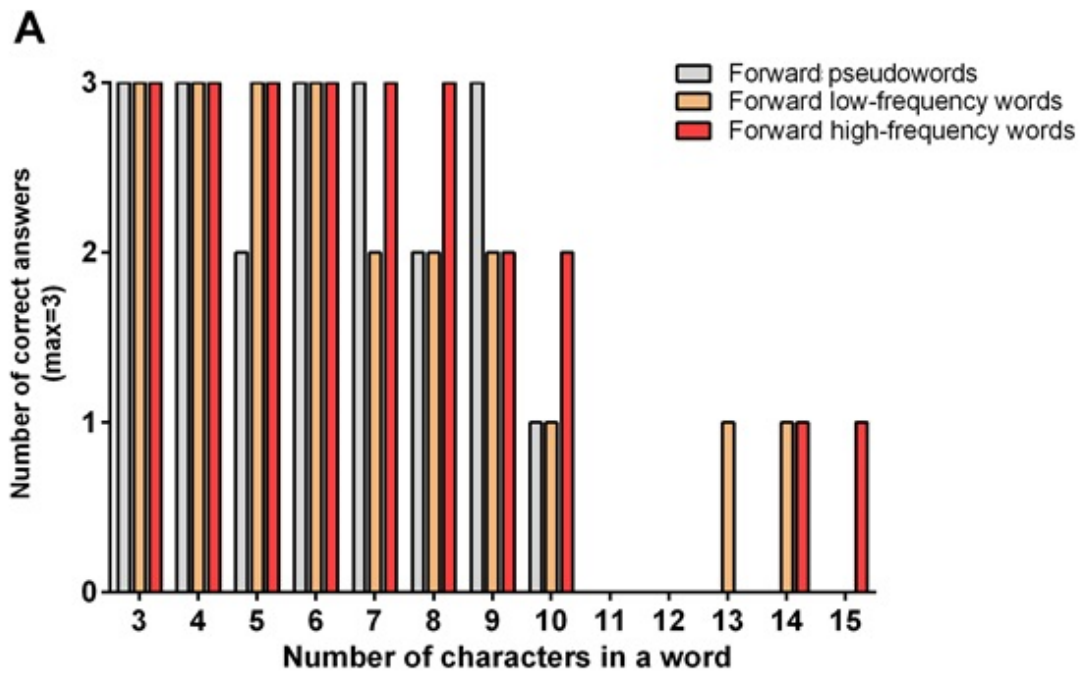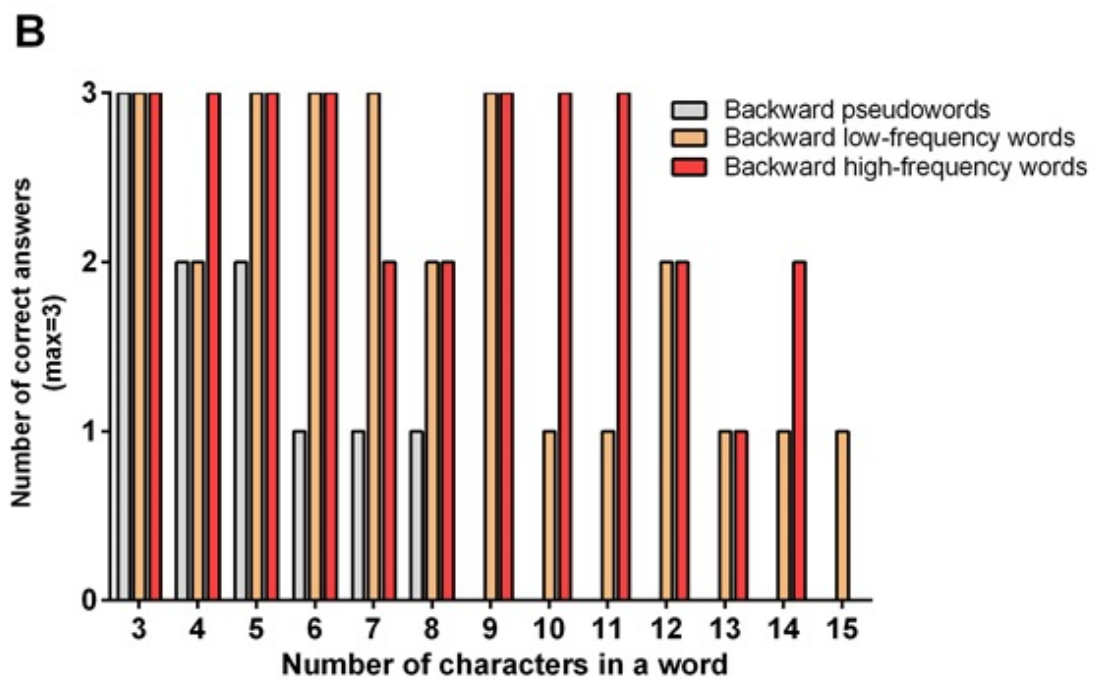

**Figure S1. Auditory word reversal task: proband's performance for forward-words and backward-words.**

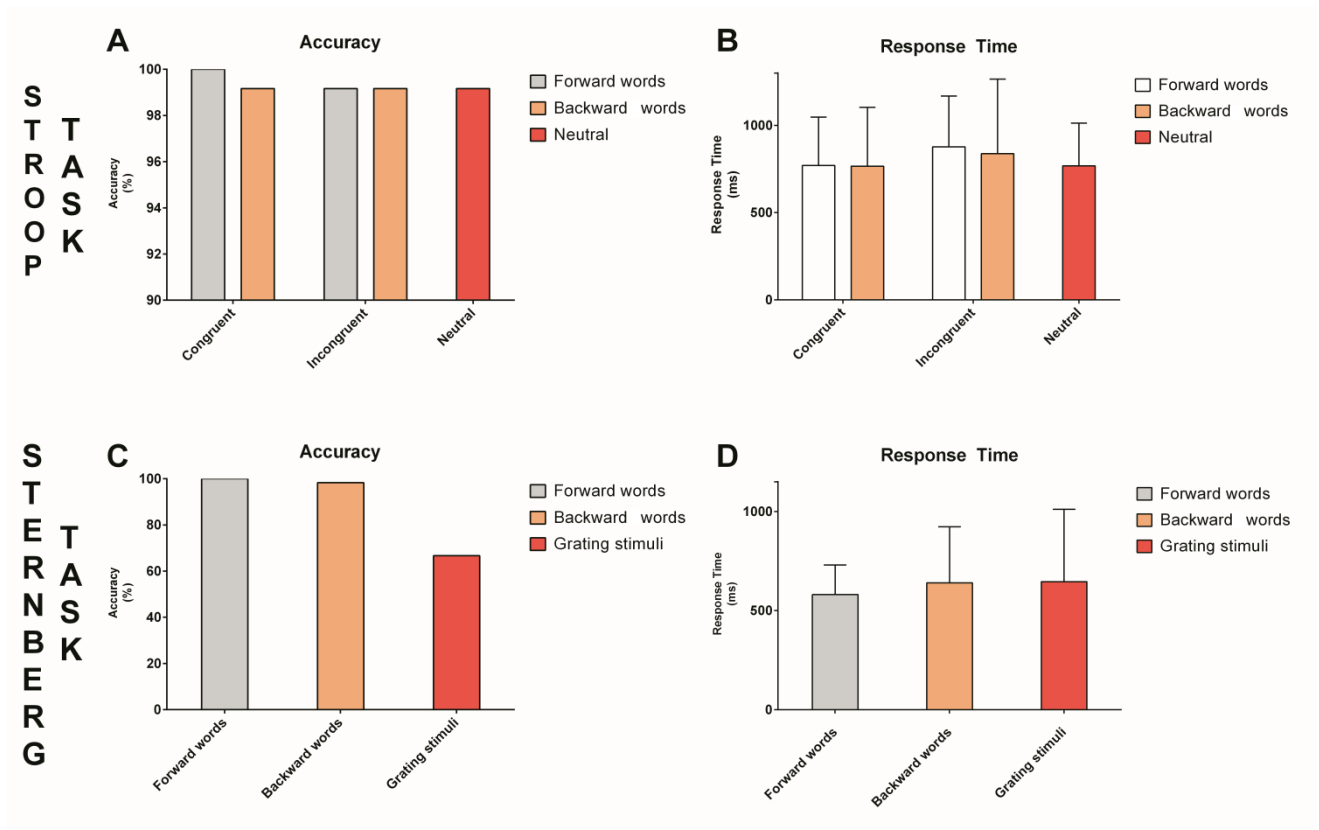

**Figure S2. Proband's scores for Stroop and Sternberg task.** Accuracy is shown in percentages (%). Response time shown in milliseconds (ms). Values represent median+IQR.

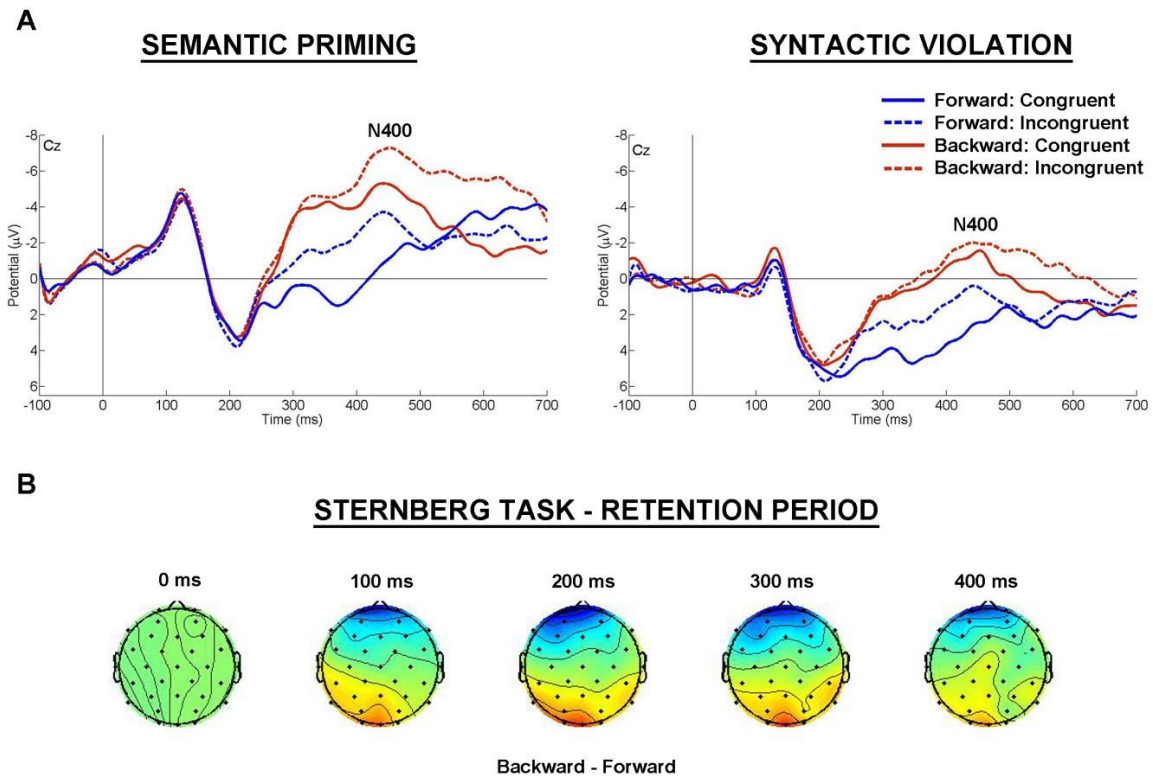

**Figure S3. Event-related potentials and scalp maps of the proband.** A) Effects of congruence (solid vs. dashed waveforms) and reversal (blue vs. red waveforms) in the semantic priming (left) and syntactic violation (right) tasks at electrode Cz. The N400 waveform can be observed in both tasks and all conditions, being larger for backward- vs. forward- and incongruent- vs. congruent-stimuli. B) During the retention period of the Sternberg task, the maintenance of backward-written words in WM was associated with an increased frontal negativity when compared to data obtained for forward-written words. This is evident from the scalp maps showing a prominent anterior negativity for the backward- vs. forward-difference waveform.

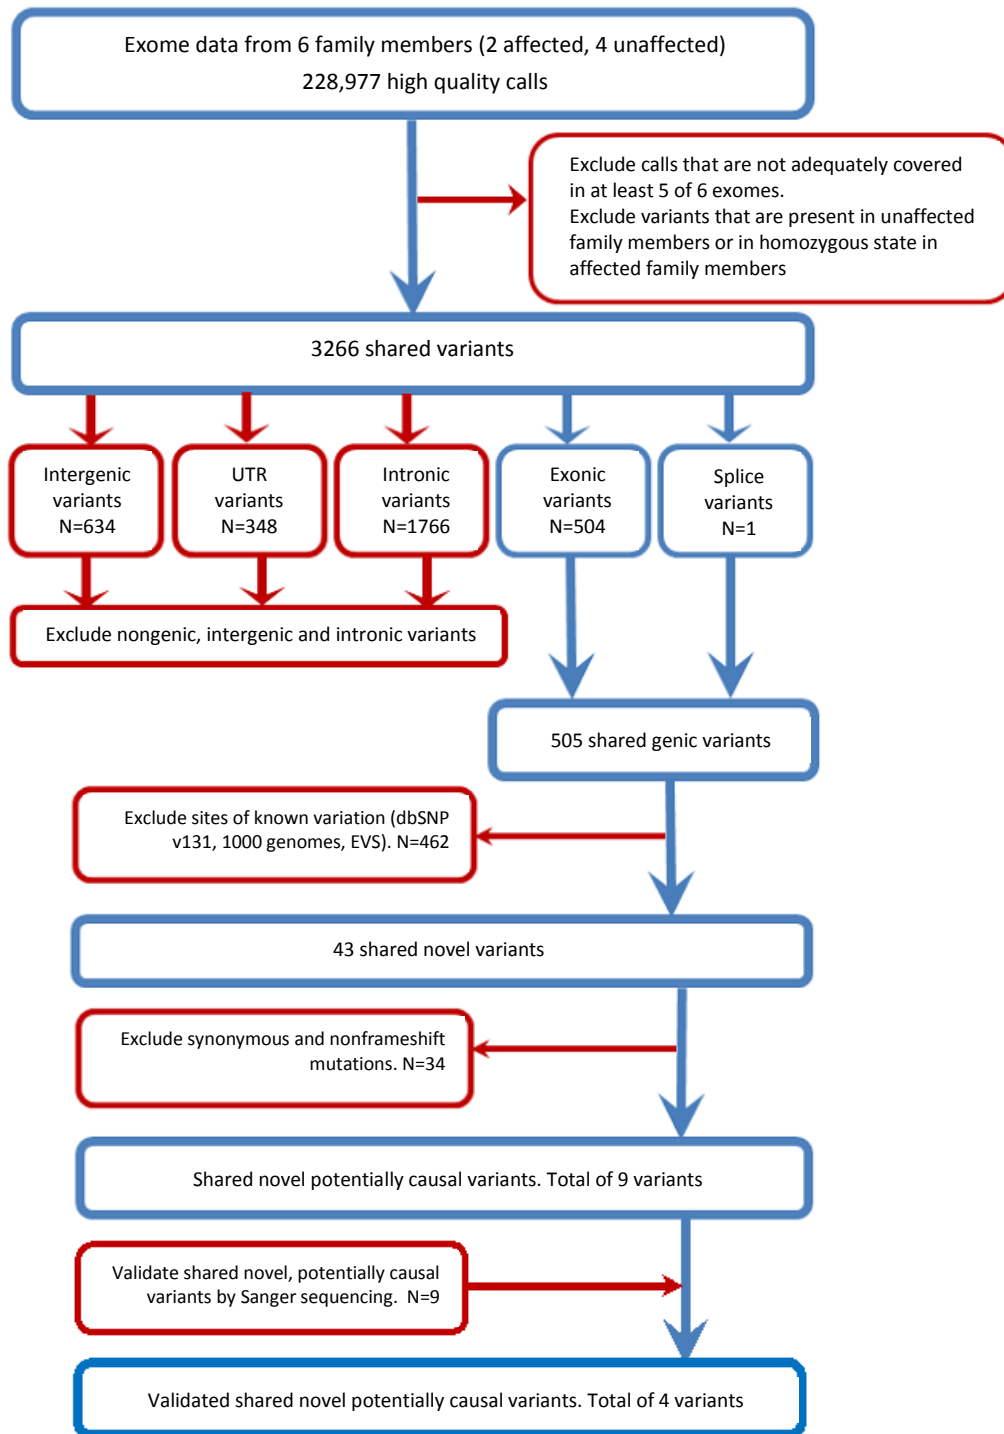

**Figure S4. Flow diagram showing the filtering of the exome data.**



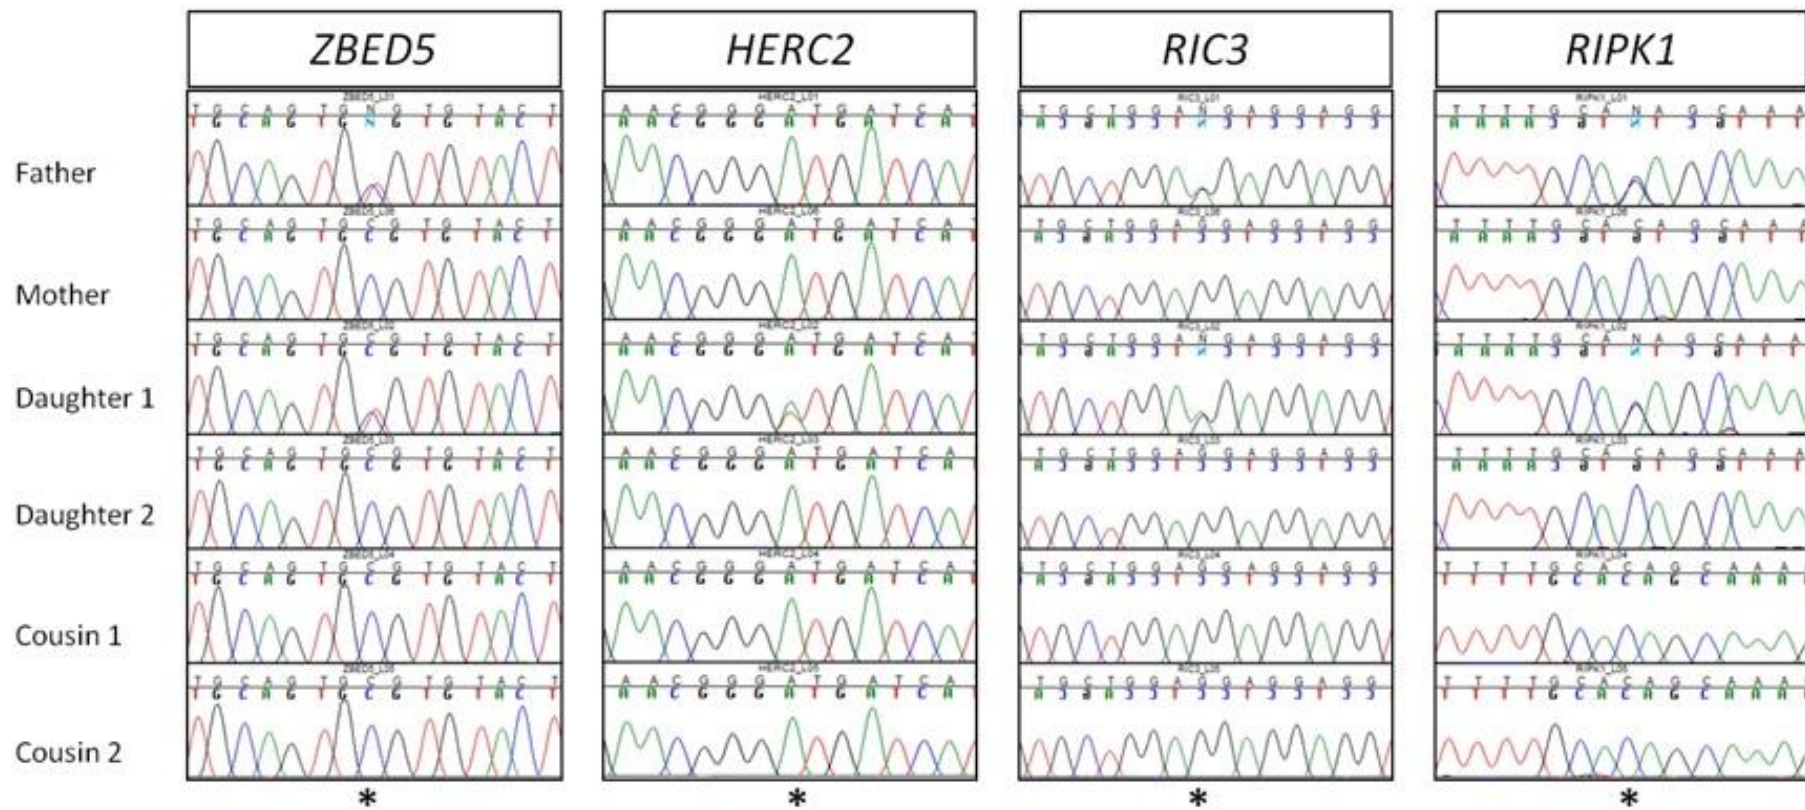

Figure S5. Validation by Sanger sequencing.

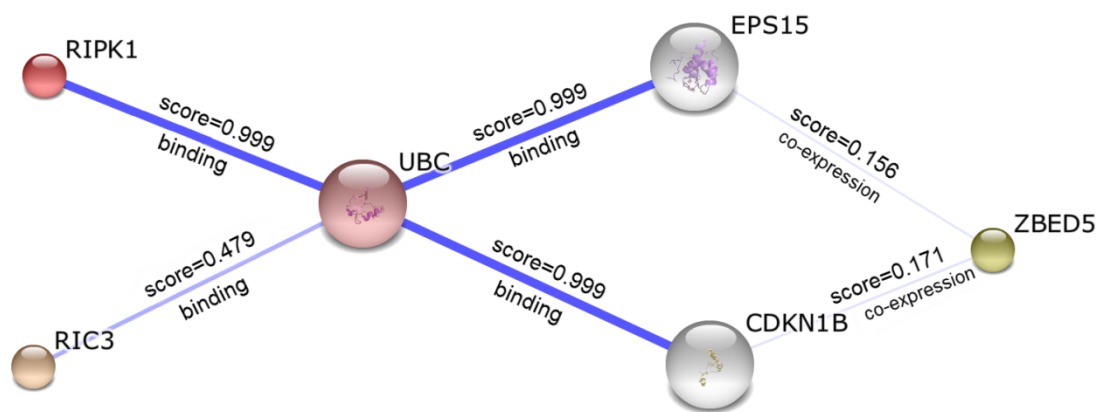

**Figure S6. UBC is a close interacting partner of RIC3 and RIPK1. And it might also be linked to ZBED5 via EPS15 and CDKN1B.**

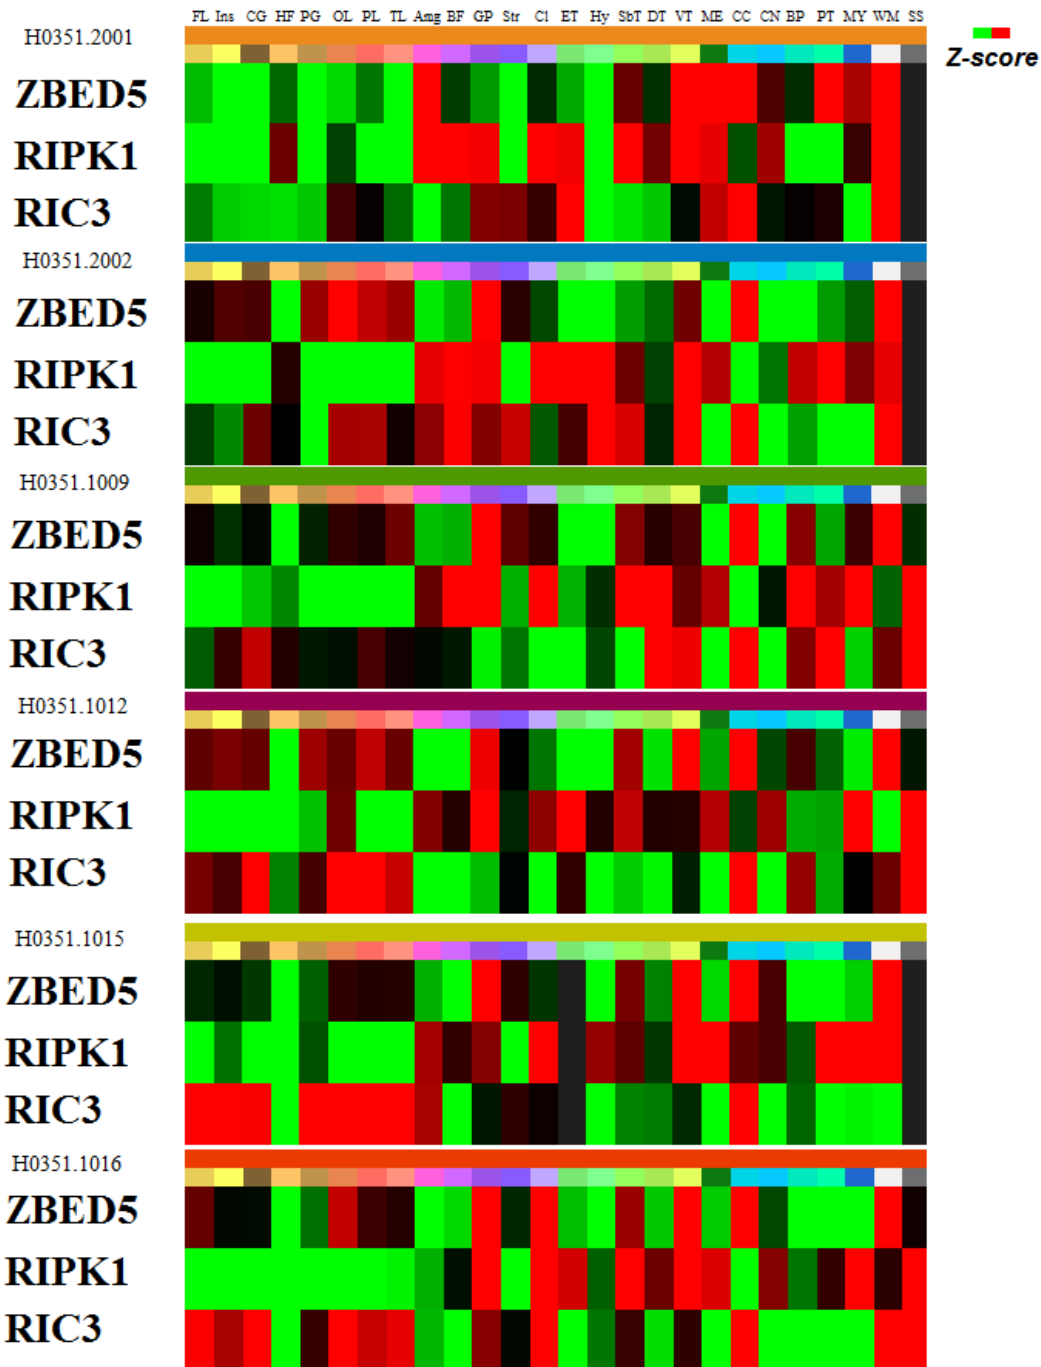

**Figure S7. Expression data from Allen Brain Atlas of 6 subjects.** FL - frontal lobe; Ins – insul; CG - cingulate gyrus; HF - hippocampal formation; PG - parahippocampal gyrus; OL - occipital lobe; PL - parietal lobe; TL - temporal lobe; Amg – amygdala; BF - basal forebrain; GP - globus pallidus; Str – striatum; Cl – claustrum; ET – epithalamus; Hy – hypothalamus; SbT – subthalamus; DT - dorsal thalamus; VT- ventral thalamus; ME – mesencephalon; CC - cerebellar cortex; CN - cerebellar nuclei; BP - basal part of pons; PT - pontine tegmentum; MY – myelencephalon; WM - white matter; and SS - sulci & spaces.

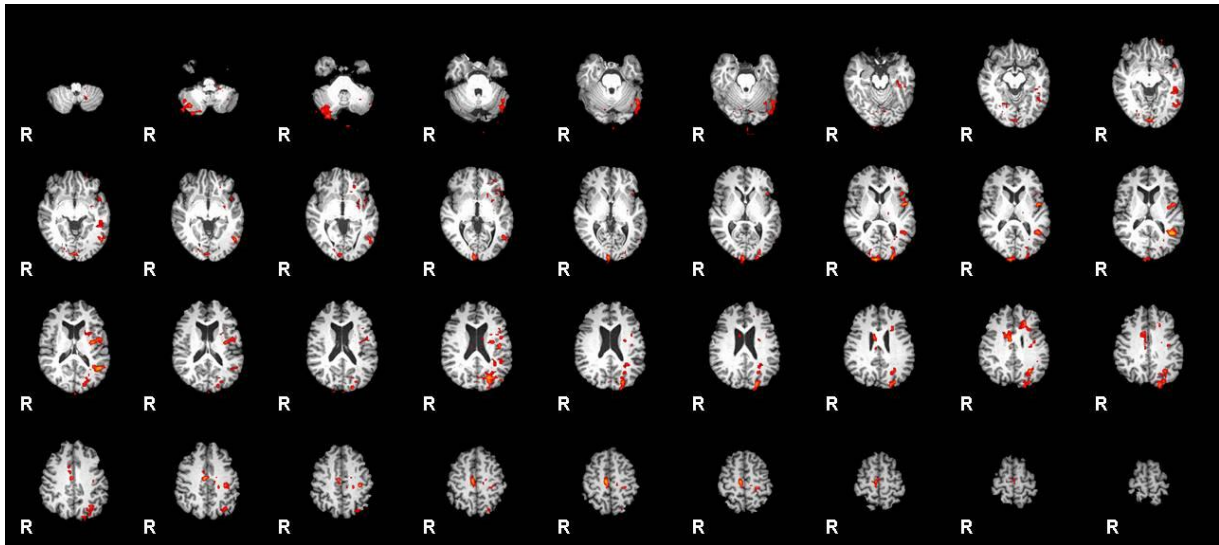

**Figure S8. fMRI maps of the proband for forward “speech”.** Spatial smoothing Full width at half maximum (FWHM)=4mm, corrected cluster threshold  $Z > 2.3$ , corrected cluster significance  $P = 0.05$ ) registered on T1 high resolution subject brain images.

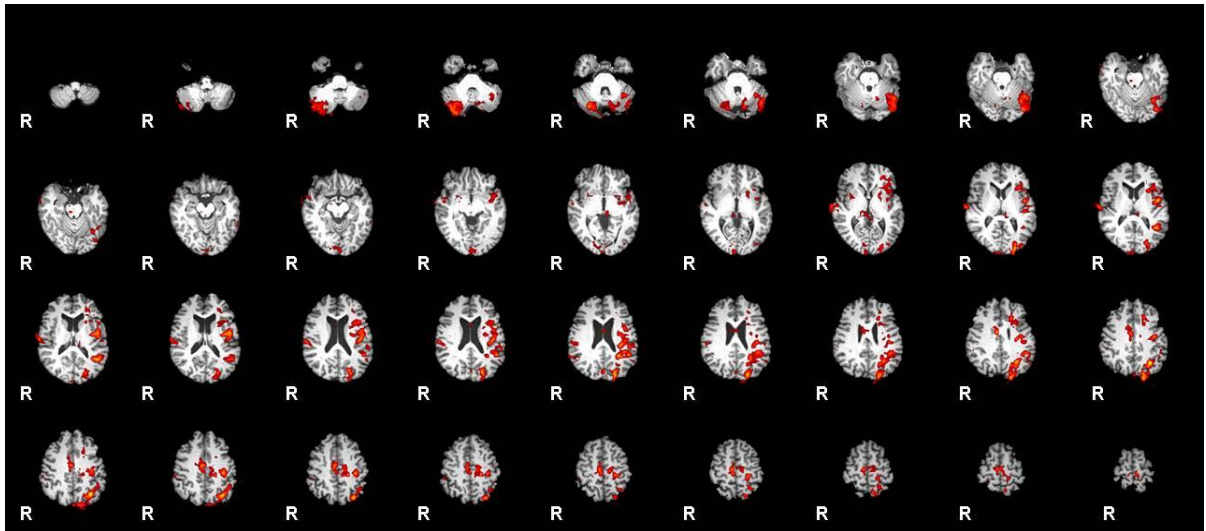

**Figure S9. fMRI maps of the proband for backward-“speech”.** Spatial smoothing Full width at half maximum (FWHM)=4mm, corrected cluster threshold  $Z > 2.3$ , corrected cluster significance  $P = 0.05$ ) registered on T1 high resolution subject brain images .

**Table S1.** Details of all tests performed in the study.

| Test                                         | Subject(s)                                                                                 | Goal of the test                                                                                                                                     |
|----------------------------------------------|--------------------------------------------------------------------------------------------|------------------------------------------------------------------------------------------------------------------------------------------------------|
| <b>Behavioral tasks</b>                      |                                                                                            |                                                                                                                                                      |
| Word reversal                                | Proband<br>Father                                                                          | To estimate performance in terms of accuracy.                                                                                                        |
| Sentence reversal                            | Proband<br>Father                                                                          | To assess whether the order of the words and/or the order of the phonemes is reversed.                                                               |
| Spontaneous backward-speech                  | Proband<br>Father                                                                          | To get an insight into the trait.                                                                                                                    |
| Auditory word reversal task                  | Proband                                                                                    | To investigate the ability to reverse words and pseudo-words.                                                                                        |
| Edinburgh Handedness Inventory               | Proband                                                                                    | To determine laterality.                                                                                                                             |
| Standardized test of verbal intelligence     | Proband                                                                                    | To determine verbal intelligence score.                                                                                                              |
| Standardized test of non-verbal intelligence | Proband                                                                                    | To assess non-verbal intelligence.                                                                                                                   |
| Digit-span                                   | Proband                                                                                    | To describe WM capacity.                                                                                                                             |
| Counting-span                                | Proband                                                                                    | To describe WM capacity.                                                                                                                             |
| Corsi block tapping task                     | Proband                                                                                    | To assess visuo-spatial WM.                                                                                                                          |
| Attention network task                       | Proband                                                                                    | To assess individual components of attention.                                                                                                        |
| Lexical decision tasks                       | Proband<br>Father<br>Controls (n=12 for each test)                                         | To further estimate performance in terms of accuracy and speed and to test for the involvement of long-term memory in processing of backward-speech. |
| Dual task                                    | Proband<br>Controls (n=6)                                                                  | To investigate involvement of WM components in backward-speech.                                                                                      |
| Stroop task                                  | Proband                                                                                    | To assess selective attention, processing speed and test for the involvement of long-term memory in processing of backward-words.                    |
| Sternberg task                               | Proband                                                                                    | To assess WM.                                                                                                                                        |
| <b>EEG Tasks</b>                             |                                                                                            |                                                                                                                                                      |
| Semantic priming task                        | Proband                                                                                    | To investigate neural signatures of the trait.                                                                                                       |
| Syntactic violation task                     | Proband                                                                                    | To investigate neural signatures of the trait.                                                                                                       |
| <b>fMRI Tasks</b>                            |                                                                                            |                                                                                                                                                      |
| Spontaneous 'speech'                         | Proband                                                                                    | To investigate neural signatures of the trait.                                                                                                       |
| <b>Genomic Analysis</b>                      |                                                                                            |                                                                                                                                                      |
| <b>Exome sequencing</b>                      | Proband<br>Father<br>Mother<br>Daughter 2<br>Cousin 1<br>Cousin 2<br>150 Serbian controls* | To investigate coding sequence changes.                                                                                                              |
| <b>SNP array</b>                             | Proband<br>Father<br>Mother<br>Daughter 2<br>Cousin 1<br>Cousin 2                          | To investigate changes in copy number variations.                                                                                                    |

\*used for Sanger sequencing validation only

**Table S2.** The proband and father were orally presented with 50 single-word stimuli and instructed to reverse the word (as heard in Audio file 1 and 2, respectively). The errors are marked red and bold (proband: two errors; father: ten errors). IPA – international phonetic alphabet.

| Item No. | Stimuli   | Translation  | IPA transcript | IPA transcript proband's response | IPA transcript father's response |
|----------|-----------|--------------|----------------|-----------------------------------|----------------------------------|
| 1        | pesma     | song         | /pesma/        | /amsep/                           | /asmep/                          |
| 2        | vetar     | wind         | /vetar/        | /ratev/                           | /ratef/                          |
| 3        | ulica     | street       | /ulitsa/       | /aciluv/                          | /aciluv/                         |
| 4        | oblak     | cloud        | /oblak/        | /kalbo/                           | /kalbo/                          |
| 5        | snaga     | power        | /snaga/        | /agans/                           | /agans/                          |
| 6        | grana     | branch       | /grana/        | /anarg/                           | /anarg/                          |
| 7        | senka     | shadow       | /senka/        | /aknes/                           | /aknes/                          |
| 8        | jesen     | autumn       | /jesen/        | /nesej/                           | /nasej/                          |
| 9        | cveće     | flowers      | /cvetǣe/       | /etǣevts/                         | /etǣevs/                         |
| 10       | osmeh     | smile        | /osmex/        | /xemso/                           | /xemso/                          |
| 11       | miris     | smell        | /miris/        | /sirim/                           | /sirim/                          |
| 12       | metar     | meter        | /metar/        | /ratem/                           | /ratem/                          |
| 13       | radost    | joy          | /radost/       | /tsodar/                          | /ts..ts..tsodar/                 |
| 14       | prozor    | window       | /prozor/       | /rozorp/                          | /rozorp/                         |
| 15       | tišina    | silence      | /tifina/       | /anifit/                          | /anifit/                         |
| 16       | pogled    | view         | /pogled/       | /delgop/                          | /delgop/                         |
| 17       | radnik    | worker       | /radnik/       | /kindar/                          | /kindar/                         |
| 18       | daljina   | distance     | /daλina/       | /aniλad/                          | /aniλad/                         |
| 19       | plamen    | flame        | /plamen/       | /nemalp/                          | /nemalp/                         |
| 20       | doktor    | doctor       | /doktor/       | /rotkod/                          | /rotkod/                         |
| 21       | nedelja   | Sunday       | /nedeλa/       | /aλeden/                          | /aλeden/                         |
| 22       | pobeda    | victory      | /pobeda/       | /adebop/                          | /adebop/                         |
| 23       | lepota    | beauty       | /lepota/       | /atopel/                          | /atopel/                         |
| 24       | telefon   | telephone    | /telefon/      | /nofelet/                         | /nofelet/                        |
| 25       | sloboda   | freedom      | /sloboda/      | /adobols/                         | /adobols/                        |
| 26       | mladost   | youth        | /mladost/      | /tsodalm/                         | /tsodalm/                        |
| 27       | planina   | mountain     | /planina/      | /aninalp/                         | /aninalp/                        |
| 28       | predlog   | suggestion   | /predlog/      | /golderp/                         | /golderp/                        |
| 29       | društvo   | society      | /druftvo/      | /ovtfurd/                         | /ovtfurd/                        |
| 30       | partija   | party        | /partija/      | /ajitrap/                         | /ajitrap/                        |
| 31       | problem   | problem      | /problem/      | /melborp/                         | /melborp/                        |
| 32       | ministar  | minister     | /ministar/     | /ratsinim/                        | /ratsinim/                       |
| 33       | svetlost  | light        | /svetlost/     | /tsoltevs/                        | /tsoltevs/                       |
| 34       | politika  | politics     | /politika/     | /akitilop/                        | /akitilop/                       |
| 35       | rezultat  | result       | /rezultat/     | /tatluzer/                        | /tatluzer/                       |
| 36       | razgovor  | conversation | /razgovor/     | /rovogzar/                        | /...rovogzar/                    |
| 37       | trenutak  | moment       | /trenutak/     | /kanutert/                        | /katunert/                       |
| 38       | preduzeće | company      | /preduzetǣe/   | /etǣezuderp/                      | /atǣezuderp/                     |
| 39       | skupština | parlament    | /skupftina/    | /anitfpuks/                       | /anitfpuks/                      |

| Item No. | Stimuli     | Translation  | IPA transcript | IPA transcript proband's response | IPA transcript father's response |
|----------|-------------|--------------|----------------|-----------------------------------|----------------------------------|
| 40       | detinjstvo  | childhood    | /detiŋstvo/    | /otsɲited/                        | <b>/ovtsɲined/</b>               |
| 41       | septembar   | september    | /septembar/    | /rabmetpes/                       | <b>/rabmetes/</b>                |
| 42       | republika   | republic     | /republika/    | /akilbuper/                       | /akilbuper/                      |
| 43       | predsednik  | president    | /predsednik/   | <b>/kindsenderp/</b>              | /kindsderp/                      |
| 44       | delegacija  | delegation   | /delegacija/   | /ajicageled/                      | /ajicageled/                     |
| 45       | proizvodnja | production   | /proizvodŋa/   | /aɲdovziorp/                      | /aɲdovziorp/                     |
| 46       | industrija  | industry     | /industrija/   | /ajirtsudni/                      | /ajirtsudni/                     |
| 47       | teritorija  | territory    | /teritorija/   | /ajirotiret/                      | <b>/ajirotoRET/</b>              |
| 48       | neprijatelj | enemy        | /neprijateʎ/   | /ʎetajirpen/                      | <b>/ʎatijerpan/</b>              |
| 49       | obaveštenje | notification | /obaveʃteɲe/   | /eɲetʃevabo/                      | <b>/eɲetʃvabo/</b>               |
| 50       | prostorija  | room         | /prostorija/   | /ajirotsorp/                      | /ajirotsorp/                     |



**Table S3.** The proband and father were orally presented with one sentence at the time and instructed to repeat the sentence backwards, in the way they usually do (as heard in Audio file 3 and 4 Respectively). The instruction was kept neutral in order to capture information regarding word order. The errors are marked red and bold (proband: one error; father: five errors). IPA – international phonetic alphabet.

| Original sentence                                                                | Translation                                                                              | IPA transcript                                                                      | IPA transcript<br>proband's response                                                      | IPA transcript<br>father's response                                                          |
|----------------------------------------------------------------------------------|------------------------------------------------------------------------------------------|-------------------------------------------------------------------------------------|-------------------------------------------------------------------------------------------|----------------------------------------------------------------------------------------------|
| Pevaj!                                                                           | Sing!                                                                                    | /pevaj/                                                                             | /javep/                                                                                   | /javep/                                                                                      |
| Milica peva.                                                                     | Milica sings.                                                                            | /militsa peva/                                                                      | /acilim avep/                                                                             | /acilim avep/                                                                                |
| Petar voli sladoxled.                                                            | Petar likes ice-cream.                                                                   | /petar voli sladoled/                                                               | /ratep ilov delodals/                                                                     | /ratep ilov delodals/                                                                        |
| Jovana ide u školu pre podne.                                                    | Jovana goes to school in the morning.                                                    | /jovana ide u ŝkolu pre podne/                                                      | /anavoj edi u ulokŝ erp endop/                                                            | /anavoj edi u <b>uŝkol...</b> ulokŝ ulokŝ erp endop/                                         |
| Kad padne mrak Zoran voli da ide na pecanje sa drugarima.                        | When it gets dark Zoran likes to go fishing with his friends.                            | /kad padne mrak zoran voli da ide na pecanje sa drugarima/                          | /dak endap karm naroz ilov ad edi an eŋacep as amiragurd/                                 | /dak endap <b>kram</b> naroz ilov ad <b>na</b> eŋacep as amiragurd/                          |
| Samo onaj ko ima hrabrosti može da govori o trenutima kada se ponašao kukavički. | Only those who have courage are able to talk about moments when they behaved as cowards. | /samo onaj ko ima xrabrosti može da govori o trenutsima kada se ponaŝao kukavitŝki/ | /omas jano ok ami itsorbarx eŝom ad irovog o amitsunet adak es oaŝanop <b>ikvavitŝuk/</b> | /omas jano ok ami itsorbarx eŝom ad irovog <b>oak jano iok</b> es <b>oaŝanap</b> iktŝivakuk/ |

**Table S4.** The proband and father were asked to talk about their favourite food while playing with language as they usually do. The errors are marked red and bold. IPA – international phonetic alphabet.

| Proband                                                                                                                                                                                                                                                                                                                                                                                                                                                                                                                                                                                                                                               |                                                                                                                                                                                                                                                                                                                                                                                                                                                                                                                                                                                                                                    |                                                                                                                                                                                                                                                                                                                                                                                                                                                                                                                                                                                                                                                              |
|-------------------------------------------------------------------------------------------------------------------------------------------------------------------------------------------------------------------------------------------------------------------------------------------------------------------------------------------------------------------------------------------------------------------------------------------------------------------------------------------------------------------------------------------------------------------------------------------------------------------------------------------------------|------------------------------------------------------------------------------------------------------------------------------------------------------------------------------------------------------------------------------------------------------------------------------------------------------------------------------------------------------------------------------------------------------------------------------------------------------------------------------------------------------------------------------------------------------------------------------------------------------------------------------------|--------------------------------------------------------------------------------------------------------------------------------------------------------------------------------------------------------------------------------------------------------------------------------------------------------------------------------------------------------------------------------------------------------------------------------------------------------------------------------------------------------------------------------------------------------------------------------------------------------------------------------------------------------------|
| IPA transcript                                                                                                                                                                                                                                                                                                                                                                                                                                                                                                                                                                                                                                        | Serbian forward                                                                                                                                                                                                                                                                                                                                                                                                                                                                                                                                                                                                                    | Translation                                                                                                                                                                                                                                                                                                                                                                                                                                                                                                                                                                                                                                                  |
| <p>/aj mamen <b>ani</b>le<del>mo</del> olej... milov ad <b>madej</b> atʃavs etatʃilzar iravts... andej do hijom hinele<del>mo</del> alej <b>es</b> acipus <b>ivapeć</b> us <b>anzar</b> eɲipel... milov ad miʒart <b>etiltfazer</b> etpecer okak hib amas ot ibes alivarpan i alivarps okat ad mamen <b>onterkok onijem</b> olej... ucip milov otaz otʃ ano eʒom okal ad es ivarpan i mamen iken inbesop suku et ote ʃab etʃuj mas alej uzoćirpak i <b>olevikaz</b> otaz <b>iz ej</b> ami <b>etiltfalzer eliverp etiltfalzer</b> esuku... milov as <b>amarkutʃep</b> as motalep as melavaktʃak i ote i ondej do <b>hiona</b>le<del>mo</del> alej/</p> | <p>/ja nemam omi<del>le</del>no jelo... volim da jedem svaʃta, razlitʃite stvari... jedna od mojih omi<del>le</del>nenih jela su supica, ćevapi, su razne lepije... volim da tražim razlitʃite recepte kako bih sama to sebi napravila i spravila, tako da nemam konkretno omi<del>le</del>no jelo... picu volim zato ʃto ona moʒe lako da se napravi i nemam neki poseban ukus te, eto, ju<del>t</del>ʃe ba<del>ʃ</del> sam jela kaprićozu i <b>?????</b> zato <b>?????</b> ima razlitʃite prelive, razlitʃite ukuse, volim sa petʃurkama, sa pelatom, sa katʃkava<del>le</del>m i eto i jedno od omi<del>le</del>nenih jela/</p> | <p>I do not have a favourite dish... I like to eat all kinds of things, different things... one of my favourite types of food are soup, meatballs, are various bagels... I like to ask for various recipes in order to be able to make that for myself by myself, so I do not have some particular favourite food... I like pizza because it can easily be prepared and I do not have some particular favourite taste, for example, only yesterday I had capricciosa and <b>?????</b> because <b>?????</b> has various sauces, various tastes, i like it with mushrooms, with tomatos, with cheese and there you have one of my favourite types of food.</p> |

| Father*                                                                                                                                                                                                                                                                                                                                                                                                                                                                                                                                                                                                    |                                                                                                                                                                                                                                                                                                                                                                                                                                                                                                                                                                                            |                                                                                                                                                                                                                                                                                                                                                                                                                                                                                          |
|------------------------------------------------------------------------------------------------------------------------------------------------------------------------------------------------------------------------------------------------------------------------------------------------------------------------------------------------------------------------------------------------------------------------------------------------------------------------------------------------------------------------------------------------------------------------------------------------------------|--------------------------------------------------------------------------------------------------------------------------------------------------------------------------------------------------------------------------------------------------------------------------------------------------------------------------------------------------------------------------------------------------------------------------------------------------------------------------------------------------------------------------------------------------------------------------------------------|------------------------------------------------------------------------------------------------------------------------------------------------------------------------------------------------------------------------------------------------------------------------------------------------------------------------------------------------------------------------------------------------------------------------------------------------------------------------------------------|
| IPA transcript                                                                                                                                                                                                                                                                                                                                                                                                                                                                                                                                                                                             | Serbian forward                                                                                                                                                                                                                                                                                                                                                                                                                                                                                                                                                                            | Translation                                                                                                                                                                                                                                                                                                                                                                                                                                                                              |
| <p>/aj ogomn milov lu<del>sap</del>...otaz im es adʒiv<del>s</del> ogomn...(zato ʃto mi se mnogo svidʒa)... derop a<del>lu</del>sap milov i <b>aɲitegaj</b>... (jag<del>net</del>ina, pored pasu<del>la</del> volim i jag<del>net</del>inu... je l' to to)... <u>ɾ</u>... ʃer enetʃep... (re<del>ʃ</del> petʃeno... ʃta bih jo<del>ʃ</del> voleo)...atʃ <b>bih</b> ʃoj <b>oleov</b>... kerub... derop <b>keruba</b> i azip... (ali)... ila ... kapi amen atʃ miloven... (ali nema ʃta ne volim)... ot ib olib <b>to ʃto</b>... to... ot otʃ ej...(najomi<del>le</del>nije)... ejno<del>li</del>man.../</p> | <p>/ja mnogo volim pasu<del>la</del>... zato mi se mnogo svidʒa... ...(zato ʃto mi se mnogo svidʒa)... pored pasu<del>la</del> voim i jag<del>net</del>inu (jag<del>net</del>ina, pored pasu<del>la</del> volim i jag<del>net</del>inu... je l' to to)... re<del>ʃ</del> petʃene (re<del>ʃ</del> petʃeno... ʃta bih jo<del>ʃ</del> voleo)... ʃta bih jo<del>ʃ</del> voleo... burek... pored bureka i pizza... (ali)... ali... ipak nema ʃta ne volim... (ali nema ʃta ne volim)... to bi bilo to ʃto... to... to... ʃto je... (najomi<del>le</del>nije)... najomi<del>le</del>nije.../</p> | <p>I like beans very much... because I love it a lot... (because I love it a lot)... besides beans I like lamb...(lamb... besides beans I like lamn... is that it)... well done (well done... what else would I like)... what else would I like... cheese pie... besides cheese pie pizza, too... (but)... but... however there is not a thing that I do not like... (there is not a thing that I do not like)... those would be... those would be my... (favourite)... favourite...</p> |

\* Utterances that are pronounced in forward order of phonemes are put in the brackets; errors are underlined.

**Table S5.** Proband's response and stimuli used in auditory word reversal task

| No of stimuli | Order in which stimuli were presented | Forwards or Backwards | Low/High-Frequency- or Pseudo-words | Word length | Lemma frequency | Stimulus | Correct response | Proband's response | Proband's response when she is not correct |
|---------------|---------------------------------------|-----------------------|-------------------------------------|-------------|-----------------|----------|------------------|--------------------|--------------------------------------------|
| 1             | 63                                    | backwards             | pseudo                              | 3           | 0               | goc      | cog              | cog                |                                            |
| 2             | 206                                   | backwards             | pseudo                              | 3           | 0               | dek      | ked              | ked                |                                            |
| 3             | 172                                   | backwards             | pseudo                              | 3           | 0               | cur      | ruc              | ruc                |                                            |
| 4             | 25                                    | backwards             | low-freq                            | 3           | 1               | ada      | ada              | ada                |                                            |
| 5             | 223                                   | backwards             | low-freq                            | 3           | 1               | bob      | bob              | bob                |                                            |
| 6             | 40                                    | backwards             | low-freq                            | 3           | 1               | išu      | uši              | uši                |                                            |
| 7             | 78                                    | backwards             | high-freq                           | 3           | 175             | čam      | mač              | mač                |                                            |
| 8             | 225                                   | backwards             | high-freq                           | 3           | 179             | ćom      | moć              | moć                |                                            |
| 9             | 201                                   | backwards             | high-freq                           | 3           | 201             | rad      | dar              | dar                |                                            |
| 10            | 42                                    | backwards             | pseudo                              | 4           | 0               | murt     | trum             | trum               |                                            |
| 11            | 135                                   | backwards             | pseudo                              | 4           | 0               | hape     | epah             | epah               |                                            |
| 12            | 51                                    | backwards             | pseudo                              | 4           | 0               | otil     | lito             | lito               |                                            |
| 13            | 107                                   | backwards             | low-freq                            | 4           | 1               | morb     | brom             | brom               |                                            |
| 14            | 83                                    | backwards             | low-freq                            | 4           | 1               | rate     | etar             | etar               |                                            |
| 15            | 149                                   | backwards             | low-freq                            | 4           | 1               | ibol     | lobi             | ilob               | ilob                                       |
| 16            | 122                                   | backwards             | high-freq                           | 4           | 164             | zalu     | ulaz             | ulaz               |                                            |
| 17            | 220                                   | backwards             | high-freq                           | 4           | 172             | arok     | kora             | kora               |                                            |
| 18            | 76                                    | backwards             | high-freq                           | 4           | 180             | agud     | duga             | duga               |                                            |
| 19            | 12                                    | backwards             | pseudo                              | 5           | 0               | evaja    | ajave            | ajave              |                                            |
| 20            | 126                                   | backwards             | pseudo                              | 5           | 0               | lazuh    | huzal            | hulaz              | hulaz                                      |
| 21            | 148                                   | backwards             | pseudo                              | 5           | 0               | rejag    | gajer            | gajer              |                                            |
| 22            | 85                                    | backwards             | low-freq                            | 5           | 1               | ilana    | anali            | anali              |                                            |
| 23            | 146                                   | backwards             | low-freq                            | 5           | 1               | natub    | butan            | butan              |                                            |
| 24            | 27                                    | backwards             | low-freq                            | 5           | 1               | remah    | hamer            | hamer              |                                            |

| No of stimuli | Order in which stimuli were presented | Forwards or Backwards | Low/High-Frequency- or Pseudo-words | Word length | Lemma frequency | Stimulus | Correct response | Proband's response | Proband's response when she is not correct |
|---------------|---------------------------------------|-----------------------|-------------------------------------|-------------|-----------------|----------|------------------|--------------------|--------------------------------------------|
| 25            | 155                                   | backwards             | high-freq                           | 5           | 176             | canev    | venac            | venac              |                                            |
| 26            | 54                                    | backwards             | high-freq                           | 5           | 178             | rakel    | lekar            | lekar              |                                            |
| 27            | 6                                     | backwards             | high-freq                           | 5           | 182             | nadub    | budan            | budan              |                                            |
| 28            | 56                                    | backwards             | pseudo                              | 6           | 0               | alenob   | bonela           | bolena             | bolena                                     |
| 29            | 133                                   | backwards             | pseudo                              | 6           | 0               | azemaj   | jameza           | jameza             |                                            |
| 30            | 1                                     | backwards             | pseudo                              | 6           | 0               | itikuv   | vukiti           | vukiti             |                                            |
| 31            | 204                                   | backwards             | low-freq                            | 6           | 1               | aragon   | nogara           | nogara             |                                            |
| 32            | 186                                   | backwards             | low-freq                            | 6           | 1               | derorp   | prored           | prored             |                                            |
| 33            | 39                                    | backwards             | low-freq                            | 6           | 1               | sonoba   | abonos           | abonos             |                                            |
| 34            | 102                                   | backwards             | high-freq                           | 6           | 172             | asevaz   | zavesa           | zavesa             |                                            |
| 35            | 230                                   | backwards             | high-freq                           | 6           | 179             | itipuk   | kupiti           | kupiti             |                                            |
| 36            | 72                                    | backwards             | high-freq                           | 6           | 184             | itisiv   | visiti           | visiti             |                                            |
| 37            | 53                                    | backwards             | pseudo                              | 7           | 0               | itimero  | oremiti          | oremiti            |                                            |
| 38            | 64                                    | backwards             | pseudo                              | 7           | 0               | itatrah  | hartati          | hartija            | hartija                                    |
| 39            | 16                                    | backwards             | pseudo                              | 7           | 0               | azenamu  | umaneza          | umezan             | umezan                                     |
| 40            | 15                                    | backwards             | low-freq                            | 7           | 1               | aciktap  | patkica          | patkica            |                                            |
| 41            | 109                                   | backwards             | low-freq                            | 7           | 1               | zerorep  | perorez          | perorez            |                                            |
| 42            | 13                                    | backwards             | low-freq                            | 7           | 1               | katsorp  | prostak          | prostak            |                                            |
| 43            | 217                                   | backwards             | high-freq                           | 7           | 174             | sarečev  | večeras          | večeras            |                                            |
| 44            | 197                                   | backwards             | high-freq                           | 7           | 176             | azevabo  | obaveza          | obaveza            |                                            |
| 45            | 180                                   | backwards             | high-freq                           | 7           | 186             | itatsaz  | zastati          | zasititi           | zasititi                                   |
| 46            | 147                                   | backwards             | pseudo                              | 8           | 0               | avonatfa | aftanova         | natfa              | natfa                                      |
| 47            | 34                                    | backwards             | pseudo                              | 8           | 0               | vitseloj | jolestiv         | jolestiv           |                                            |
| 48            | 43                                    | backwards             | pseudo                              | 8           | 0               | itiberha | ahrebiti         | ahrebt             | ahrebt                                     |
| 49            | 30                                    | backwards             | low-freq                            | 8           | 1               | nazicnok | koncizan         | koncizan           |                                            |
| 50            | 57                                    | backwards             | low-freq                            | 8           | 1               | naleunam | manuelan         | munaela            | munaela                                    |

| No of stimuli | Order in which stimuli were presented | Forwards or Backwards | Low/High-Frequency- or Pseudo-words | Word length | Lemma frequency | Stimulus    | Correct response | Proband's response | Proband's response when she is not correct |
|---------------|---------------------------------------|-----------------------|-------------------------------------|-------------|-----------------|-------------|------------------|--------------------|--------------------------------------------|
| 51            | 65                                    | backwards             | low-freq                            | 8           | 1               | sipovarp    | pravopis         | pravopis           |                                            |
| 52            | 207                                   | backwards             | high-freq                           | 8           | 172             | tetilavk    | kvalitet         | kvalitet           |                                            |
| 53            | 99                                    | backwards             | high-freq                           | 8           | 174             | itunerko    | okrenuti         | okrutni            | okrutni                                    |
| 54            | 19                                    | backwards             | high-freq                           | 8           | 188             | vitkelok    | kolektiv         | kolektiv           |                                            |
| 55            | 139                                   | backwards             | pseudo                              | 9           | 0               | itarelhod   | dohlerati        | dohlerati          |                                            |
| 56            | 177                                   | backwards             | pseudo                              | 9           | 0               | notanabru   | urbanaton        | urbodan            | urbodan                                    |
| 57            | 104                                   | backwards             | pseudo                              | 9           | 0               | ititsorku   | ukrostiti        | ukrsti             | ukrsti                                     |
| 58            | 68                                    | backwards             | low-freq                            | 9           | 1               | cavadorad   | darodavac        | darodavac          |                                            |
| 59            | 31                                    | backwards             | low-freq                            | 9           | 1               | ajisergid   | digresija        | digresija          |                                            |
| 60            | 61                                    | backwards             | low-freq                            | 9           | 1               | nariludno   | onduliran        | onduliran          |                                            |
| 61            | 189                                   | backwards             | high-freq                           | 9           | 158             | acindejaz   | zajednica        | zajednica          |                                            |
| 62            | 55                                    | backwards             | high-freq                           | 9           | 175             | itisorpo    | oprostiti        | oprostiti          |                                            |
| 63            | 106                                   | backwards             | high-freq                           | 9           | 220             | rodasabma   | ambasador        | ambasador          |                                            |
| 64            | 165                                   | backwards             | pseudo                              | 10          | 0               | ajinodiled  | delidonija       | delitioje          | delitioje                                  |
| 65            | 159                                   | backwards             | pseudo                              | 10          | 0               | itilobokto  | otkoboliti       | oktoboliti         | oktoboliti                                 |
| 66            | 226                                   | backwards             | pseudo                              | 10          | 0               | ititabjilb  | blijbatiti       | blivatiti          | blivatiti                                  |
| 67            | 176                                   | backwards             | low-freq                            | 10          | 1               | itaviravaz  | zavarivati       | zavirivati         | zavirivati                                 |
| 68            | 229                                   | backwards             | low-freq                            | 10          | 1               | onviseckus  | sukcesivno       | sukcesivan         | sukcesivan                                 |
| 69            | 127                                   | backwards             | low-freq                            | 10          | 1               | itatevelko  | oklevetati       | oklevetati         |                                            |
| 70            | 79                                    | backwards             | high-freq                           | 10          | 83              | rotizopmok  | kompozitor       | kompozitor         |                                            |
| 71            | 87                                    | backwards             | high-freq                           | 10          | 166             | itidobolso  | osloboditi       | osloboditi         |                                            |
| 72            | 185                                   | backwards             | high-freq                           | 10          | 294             | ajiotiret   | teritorija       | teritorija         |                                            |
| 73            | 210                                   | backwards             | pseudo                              | 11          | 0               | intolamućen | nećumalotni      | nećumolatni        | nećumolatni                                |
| 74            | 10                                    | backwards             | pseudo                              | 11          | 0               | iksdalgonet | tenogladski      | tednologni         | tednologni                                 |
| 75            | 95                                    | backwards             | pseudo                              | 11          | 0               | tedislebimu | umibelsidet      | NEXT               | NEXT                                       |
| 76            | 23                                    | backwards             | low-freq                            | 11          | 1               | mazirutnava | avanturizam      | avanturizam        |                                            |

| No of stimuli | Order in which stimuli were presented | Forwards or Backwards | Low/High-Frequency- or Pseudo-words | Word length | Lemma frequency | Stimulus       | Correct response | Proband's response | Proband's response when she is not correct |
|---------------|---------------------------------------|-----------------------|-------------------------------------|-------------|-----------------|----------------|------------------|--------------------|--------------------------------------------|
| 77            | 166                                   | backwards             | low-freq                            | 11          | 1               | ajicnevkole    | elokvencija      | eloknivečna        | eloknivečna                                |
| 78            | 190                                   | backwards             | low-freq                            | 11          | 1               | naralupopen    | nepopularan      | nepulopopen        | nepulopopen                                |
| 79            | 169                                   | backwards             | high-freq                           | 11          | 85              | ajicitsevni    | investicija      | investicija        |                                            |
| 80            | 137                                   | backwards             | high-freq                           | 11          | 91              | ajicizopmok    | kompozicija      | kompozicija        |                                            |
| 81            | 160                                   | backwards             | high-freq                           | 11          | 393             | indoranuđem    | međunarodni      | međunarodni        |                                            |
| 82            | 84                                    | backwards             | pseudo                              | 12          | 0               | ajisnelepmog   | gompelensija     | NEXT               | NEXT                                       |
| 83            | 154                                   | backwards             | pseudo                              | 12          | 0               | itapozimaklo   | olkamizopati     | olkamipozitpo      | olkamipozitpo                              |
| 84            | 9                                     | backwards             | pseudo                              | 12          | 0               | ovtstarpokli   | ilkoprastvo      | NEXT               | NEXT                                       |
| 85            | 170                                   | backwards             | low-freq                            | 12          | 1               | itavartevorp   | provetravati     | provetravati       |                                            |
| 86            | 216                                   | backwards             | low-freq                            | 12          | 1               | navitakovorp   | provokativan     | progovoriti        | progovoriti                                |
| 87            | 231                                   | backwards             | low-freq                            | 12          | 1               | narizinolbaš   | šabloniziran     | šabloniziran       |                                            |
| 88            | 228                                   | backwards             | high-freq                           | 12          | 26              | ajicamitigel   | legitimacija     | legalizacija       | legalizacija                               |
| 89            | 158                                   | backwards             | high-freq                           | 12          | 27              | ajicazilibom   | mobilizacija     | mobilizacija       |                                            |
| 90            | 82                                    | backwards             | high-freq                           | 12          | 630             | ajicnerefrok   | konferencija     | konferencija       |                                            |
| 91            | 59                                    | backwards             | pseudo                              | 13          | 0               | iksnahirpubel  | lebuprihanski    | luberhist          | luberhist                                  |
| 92            | 151                                   | backwards             | pseudo                              | 13          | 0               | nalitablezmog  | gomzelbatilan    | gomzbitnav         | gomzbitnav                                 |
| 93            | 35                                    | backwards             | pseudo                              | 13          | 0               | tsonvarbonbal  | labnobravnost    | NEXT               | NEXT                                       |
| 94            | 182                                   | backwards             | low-freq                            | 13          | 1               | ajicazinomrah  | harmonizacija    | harmonija          | harmonija                                  |
| 95            | 222                                   | backwards             | low-freq                            | 13          | 1               | inoicutitsnok  | konstitucioni    | utisnuti           | utisnuti                                   |
| 96            | 96                                    | backwards             | low-freq                            | 13          | 1               | navoziradnats  | standarizovan    | standarizovan      |                                            |
| 97            | 75                                    | backwards             | high-freq                           | 13          | 37              | tsonvitkudorp  | produktivnost    | NEXT               | NEXT                                       |
| 98            | 184                                   | backwards             | high-freq                           | 13          | 39              | navolpohudzav  | vazduhoplovan    | vazduhoplov        | vazduhoplov                                |
| 99            | 21                                    | backwards             | high-freq                           | 13          | 49              | navitavreznok  | konzervativan    | konzervativan      |                                            |
| 100           | 46                                    | backwards             | pseudo                              | 14          | 0               | inkitsimajidoz | zodijamistikni   | NEXT               | NEXT                                       |
| 101           | 69                                    | backwards             | pseudo                              | 14          | 0               | ikčatekonramal | lamarnoketački   | melanholičar       | melanholičar                               |
| 102           | 224                                   | backwards             | pseudo                              | 14          | 0               | ikčitsiradibag | gabidaristički   | gabidistčiksi      | gabidistikči                               |

| No of stimuli | Order in which stimuli were presented | Forwards or Backwards | Low/High-Frequency- or Pseudo-words | Word length | Lemma frequency | Stimulus        | Correct response | Proband's response | Proband's response when she is not correct |
|---------------|---------------------------------------|-----------------------|-------------------------------------|-------------|-----------------|-----------------|------------------|--------------------|--------------------------------------------|
| 103           | 209                                   | backwards             | low-freq                            | 14          | 1               | ajizarknisoidi  | idiosinkrazija   | idiosinkrazija     |                                            |
| 104           | 98                                    | backwards             | low-freq                            | 14          | 1               | ajicnedopserok  | korespodencija   | korespondentan     | korespondentan                             |
| 105           | 92                                    | backwards             | low-freq                            | 14          | 1               | iksraketoilbib  | bibliotekarski   | biblioteka         | biblioteka                                 |
| 106           | 196                                   | backwards             | high-freq                           | 14          | 20              | ikstetizrevinu  | univerzitetški   | univerzitetški     |                                            |
| 107           | 11                                    | backwards             | high-freq                           | 14          | 23              | ajickurtsnoker  | rekonstrukcija   | rekonstrukcija     |                                            |
| 108           | 193                                   | backwards             | high-freq                           | 14          | 63              | ikčamenondapaz  | zapadnonemački   | zapadnički         | zapadnički                                 |
| 109           | 161                                   | backwards             | pseudo                              | 15          | 0               | acinčitokodezet | tezedokotičnica  | dezertiran         | dezertiran                                 |
| 110           | 152                                   | backwards             | pseudo                              | 15          | 0               | naritsiledgalag | galagdelistiran  | galanitster        | galanitster                                |
| 111           | 48                                    | backwards             | pseudo                              | 15          | 0               | natamoimatlepmi | impeltamiomatan  | implementirati     | implementirati                             |
| 112           | 203                                   | backwards             | low-freq                            | 15          | 1               | inoicaterpretni | interpretacioni  | interpretacioni    |                                            |
| 113           | 132                                   | backwards             | low-freq                            | 15          | 1               | cavitartsinimda | administrativac  | administracija     | administracija                             |
| 114           | 47                                    | backwards             | low-freq                            | 15          | 1               | ovtsnajirategev | vegetarijanstvo  | vegeterijanac      | vegeterijanac                              |
| 115           | 70                                    | backwards             | high-freq                           | 15          | 12              | ajicazilajiceps | specijalizacija  | specijalan         | specijalan                                 |
| 116           | 218                                   | backwards             | high-freq                           | 15          | 14              | etšilidargodorb | brodogradilište  | brodograd          | brodograd                                  |
| 117           | 128                                   | backwards             | high-freq                           | 15          | 36              | cinjšidogotesed | desetogodišnjica | deset..ne znam     | deset... ("I don't know.")                 |
| 118           | 37                                    | forwards              | pseudo                              | 3           | 0               | juk             | kuj              | kuj                |                                            |
| 119           | 123                                   | forwards              | pseudo                              | 3           | 0               | gil             | lig              | lig                |                                            |
| 120           | 212                                   | forwards              | pseudo                              | 3           | 0               | šad             | daš              | daš                |                                            |
| 121           | 74                                    | forwards              | low-freq                            | 3           | 1               | čep             | peč              | peč                |                                            |
| 122           | 211                                   | forwards              | low-freq                            | 3           | 1               | kub             | buk              | buk                |                                            |
| 123           | 89                                    | forwards              | low-freq                            | 3           | 1               | ruž             | žur              | žur                |                                            |
| 124           | 134                                   | forwards              | high-freq                           | 3           | 174             | sok             | kos              | kos                |                                            |
| 125           | 62                                    | forwards              | high-freq                           | 3           | 184             | boj             | job              | job                |                                            |
| 126           | 175                                   | forwards              | high-freq                           | 3           | 192             | laž             | žal              | žal                |                                            |
| 127           | 93                                    | forwards              | pseudo                              | 4           | 0               | krza            | azrk             | azrk               |                                            |

| No of stimuli | Order in which stimuli were presented | Forwards or Backwards | Low/High-Frequency- or Pseudo-words | Word length | Lemma frequency | Stimulus | Correct response | Proband's response | Proband's response when she is not correct |
|---------------|---------------------------------------|-----------------------|-------------------------------------|-------------|-----------------|----------|------------------|--------------------|--------------------------------------------|
| 128           | 191                                   | forwards              | pseudo                              | 4           | 0               | jets     | stej             | stej               |                                            |
| 129           | 156                                   | forwards              | pseudo                              | 4           | 0               | geče     | ečeg             | ečeg               |                                            |
| 130           | 77                                    | forwards              | low-freq                            | 4           | 1               | brka     | akrb             | akrb               |                                            |
| 131           | 129                                   | forwards              | low-freq                            | 4           | 1               | keks     | skek             | skek               |                                            |
| 132           | 173                                   | forwards              | low-freq                            | 4           | 1               | meče     | ečem             | ečem               |                                            |
| 133           | 181                                   | forwards              | high-freq                           | 4           | 157             | kula     | aluk             | aluk               |                                            |
| 134           | 171                                   | forwards              | high-freq                           | 4           | 173             | peti     | itep             | itep               |                                            |
| 135           | 208                                   | forwards              | high-freq                           | 4           | 180             | sala     | alas             | alas               |                                            |
| 136           | 38                                    | forwards              | pseudo                              | 5           | 0               | hapka    | akpah            | apkah              | apkah                                      |
| 137           | 145                                   | forwards              | pseudo                              | 5           | 0               | nilet    | telin            | telin              |                                            |
| 138           | 45                                    | forwards              | pseudo                              | 5           | 0               | gotap    | patog            | patog              |                                            |
| 139           | 142                                   | forwards              | low-freq                            | 5           | 1               | čarka    | akrač            | akrač              |                                            |
| 140           | 213                                   | forwards              | low-freq                            | 5           | 1               | cimet    | temic            | temic              |                                            |
| 141           | 32                                    | forwards              | low-freq                            | 5           | 1               | dolap    | palod            | palod              |                                            |
| 142           | 234                                   | forwards              | high-freq                           | 5           | 170             | roman    | namor            | namor              |                                            |
| 143           | 178                                   | forwards              | high-freq                           | 5           | 180             | bogat    | tagob            | tagob              |                                            |
| 144           | 29                                    | forwards              | high-freq                           | 5           | 181             | odelo    | oledo            | oledo              |                                            |
| 145           | 168                                   | forwards              | pseudo                              | 6           | 0               | kofuda   | adufok           | adufok             |                                            |
| 146           | 183                                   | forwards              | pseudo                              | 6           | 0               | polona   | anolop           | anolop             |                                            |
| 147           | 187                                   | forwards              | pseudo                              | 6           | 0               | tamiti   | itimat           | itimat             |                                            |
| 148           | 49                                    | forwards              | low-freq                            | 6           | 1               | moruna   | anurom           | anurom             |                                            |
| 149           | 221                                   | forwards              | low-freq                            | 6           | 1               | tragač   | čagart           | čagart             |                                            |
| 150           | 22                                    | forwards              | low-freq                            | 6           | 1               | unučad   | dačunu           | dačunu             |                                            |
| 151           | 131                                   | forwards              | high-freq                           | 6           | 170             | zenica   | acinez           | acinez             |                                            |
| 152           | 91                                    | forwards              | high-freq                           | 6           | 182             | dodati   | itadod           | itadod             |                                            |
| 153           | 44                                    | forwards              | high-freq                           | 6           | 182             | gasiti   | itisag           | itisag             |                                            |



| No of stimuli | Order in which stimuli were presented | Forwards or Backwards | Low/High-Frequency- or Pseudo-words | Word length | Lemma frequency | Stimulus  | Correct response | Proband's response | Proband's response when she is not correct |
|---------------|---------------------------------------|-----------------------|-------------------------------------|-------------|-----------------|-----------|------------------|--------------------|--------------------------------------------|
| 154           | 58                                    | forwards              | pseudo                              | 7           | 0               | lobiret   | teribol          | teribol            |                                            |
| 155           | 118                                   | forwards              | pseudo                              | 7           | 0               | gofanak   | kanafog          | kanafog            |                                            |
| 156           | 233                                   | forwards              | pseudo                              | 7           | 0               | fronela   | alenorf          | alenorf            |                                            |
| 157           | 2                                     | forwards              | low-freq                            | 7           | 1               | oligarh   | hragilo          | ragilho            | ragilho                                    |
| 158           | 121                                   | forwards              | low-freq                            | 7           | 1               | potanko   | oknatop          | oknatop            |                                            |
| 159           | 117                                   | forwards              | low-freq                            | 7           | 1               | prečica   | acičerp          | acičerp            |                                            |
| 160           | 192                                   | forwards              | high-freq                           | 7           | 174             | odličan   | načildo          | načildo            |                                            |
| 161           | 125                                   | forwards              | high-freq                           | 7           | 180             | apoteka   | aketopa          | aketopa            |                                            |
| 162           | 18                                    | forwards              | high-freq                           | 7           | 186             | promena   | anemorp          | anemorp            |                                            |
| 163           | 163                                   | forwards              | pseudo                              | 8           | 0               | ozletalo  | olatelzo         | olatelzo           |                                            |
| 164           | 36                                    | forwards              | pseudo                              | 8           | 0               | ginovati  | itavonig         | itavogin           | itavogin                                   |
| 165           | 227                                   | forwards              | pseudo                              | 8           | 0               | tazomati  | itamozat         | itamozat           |                                            |
| 166           | 138                                   | forwards              | low-freq                            | 8           | 1               | klasično  | ončisalk         | ončisalk           |                                            |
| 167           | 113                                   | forwards              | low-freq                            | 8           | 1               | mauzolej  | jelozuam         | leuzojam           | leuzojam                                   |
| 168           | 66                                    | forwards              | low-freq                            | 8           | 1               | nabasati  | itasaban         | itasaban           |                                            |
| 169           | 114                                   | forwards              | high-freq                           | 8           | 170             | ispuniti  | itinupsi         | itinupsi           |                                            |
| 170           | 205                                   | forwards              | high-freq                           | 8           | 178             | radovati  | itavodar         | itavodar           |                                            |
| 171           | 179                                   | forwards              | high-freq                           | 8           | 186             | milovati  | itavolim         | itavolim           |                                            |
| 172           | 3                                     | forwards              | pseudo                              | 9           | 0               | inumacija | ajicamuni        | ajicamuni          |                                            |
| 173           | 202                                   | forwards              | pseudo                              | 9           | 0               | čikovetar | ratevokič        | ratevokič          |                                            |
| 174           | 130                                   | forwards              | pseudo                              | 9           | 0               | šanolakaj | jakalonaš        | jakalonaš          |                                            |
| 175           | 116                                   | forwards              | low-freq                            | 9           | 1               | brodarica | aciradorb        | aciradorb          |                                            |
| 176           | 67                                    | forwards              | low-freq                            | 9           | 1               | intuicija | ajiciutni        | ajiciutni          |                                            |
| 177           | 219                                   | forwards              | low-freq                            | 9           | 1               | natalitet | tetilatan        | tetilana           | tetilana                                   |
| 178           | 174                                   | forwards              | high-freq                           | 9           | 152             | devojčica | acičjoved        | ajicčoved          | ajicčoved                                  |
| 179           | 52                                    | forwards              | high-freq                           | 9           | 186             | saobračaj | jačarboas        | jačarboas          |                                            |

| No of stimuli | Order in which stimuli were presented | Forwards or Backwards | Low/High-Frequency- or Pseudo-words | Word length | Lemma frequency | Stimulus     | Correct response | Proband's response | Proband's response when she is not correct |
|---------------|---------------------------------------|-----------------------|-------------------------------------|-------------|-----------------|--------------|------------------|--------------------|--------------------------------------------|
| 180           | 105                                   | forwards              | high-freq                           | 9           | 192             | kilometar    | ratemolik        | ratemolik          |                                            |
| 181           | 60                                    | forwards              | pseudo                              | 10          | 0               | bogasibati   | itabisagob       | itabisogap         | itabisogap                                 |
| 182           | 188                                   | forwards              | pseudo                              | 10          | 0               | hetmozopan   | napozomteh       | napozomteh         |                                            |
| 183           | 140                                   | forwards              | pseudo                              | 10          | 0               | otkobalati   | italabokto       | itabolotkoo        | itabolokto                                 |
| 184           | 81                                    | forwards              | low-freq                            | 10          | 1               | zgradurina   | anirudargz       | anirudargz         |                                            |
| 185           | 7                                     | forwards              | low-freq                            | 10          | 1               | razasipati   | itapisazar       | itipasizar         | itipasizar                                 |
| 186           | 153                                   | forwards              | low-freq                            | 10          | 1               | rafinirano   | onarinifar       | oranifiran         | oranifiran                                 |
| 187           | 41                                    | forwards              | high-freq                           | 10          | 140             | zaustaviti   | itivatsuaz       | ivatsuaz           | ivatsuaz                                   |
| 188           | 194                                   | forwards              | high-freq                           | 10          | 196             | prostoriya   | ajirotsorp       | ajirotsorp         |                                            |
| 189           | 50                                    | forwards              | high-freq                           | 10          | 209             | jednosoban   | nabosondej       | nabosondej         |                                            |
| 190           | 195                                   | forwards              | pseudo                              | 11          | 0               | apalitanski  | iksnatilapa      | iksnatipilan       | iksnatipilan                               |
| 191           | 150                                   | forwards              | pseudo                              | 11          | 0               | zokimanizam  | mazinamikoz      | mazohizam          | mazohizam                                  |
| 192           | 136                                   | forwards              | pseudo                              | 11          | 0               | lugomonilac  | calinomogul      | calonigomul        | calonigomul                                |
| 193           | 100                                   | forwards              | low-freq                            | 11          | 1               | antagonizam  | mazinogatna      | mazogitna          | mazogitna                                  |
| 194           | 73                                    | forwards              | low-freq                            | 11          | 1               | ispreturati  | itaruterpsi      | itaruterpsi        |                                            |
| 195           | 5                                     | forwards              | low-freq                            | 11          | 1               | liberalizam  | mazilarebil      | mazilarebil        |                                            |
| 196           | 103                                   | forwards              | high-freq                           | 11          | 100             | temperatura  | arutarepmet      | arutapmerter       | arutapmerter                               |
| 197           | 97                                    | forwards              | high-freq                           | 11          | 209             | rukovodilac  | calidovokur      | cavididukur        | cavididukur                                |
| 198           | 33                                    | forwards              | high-freq                           | 11          | 220             | socijalizam  | mazilajicos      | maizalicos         | maizalicos                                 |
| 199           | 4                                     | forwards              | pseudo                              | 12          | 0               | olkaminacija | ajicanimaklo     | ajicanikumo        | ajicanikumo                                |
| 200           | 112                                   | forwards              | pseudo                              | 12          | 0               | nimidrapstvo | ovtspardimin     | ostvariti          | ostvariti                                  |
| 201           | 101                                   | forwards              | pseudo                              | 12          | 0               | zehledalimat | tamiladelhez     | tamiledhez         | tamiledhez                                 |
| 202           | 20                                    | forwards              | low-freq                            | 12          | 1               | pravougaonik | kinoaguovarp     | kinavoougarp       | kinavoougarp                               |
| 203           | 115                                   | forwards              | low-freq                            | 12          | 1               | stimulativan | navitalumits     | navitulimps        | navitulimps                                |
| 204           | 232                                   | forwards              | low-freq                            | 12          | 1               | fermentacija | ajicatnemref     | ajicatenemref      | ajicatenemref                              |
| 205           | 157                                   | forwards              | high-freq                           | 12          | 20              | kanalizacija | ajicazilanak     | ajicazilinak       | ajicazilinak                               |

| No of stimuli | Order in which stimuli were presented | Forwards or Backwards | Low/High-Frequency- or Pseudo-words | Word length | Lemma frequency | Stimulus        | Correct response | Proband's response | Proband's response when she is not correct |
|---------------|---------------------------------------|-----------------------|-------------------------------------|-------------|-----------------|-----------------|------------------|--------------------|--------------------------------------------|
| 206           | 119                                   | forwards              | high-freq                           | 12          | 23              | laboratorija    | ajirotarobal     | ajitarobal         | ajitarobal                                 |
| 207           | 120                                   | forwards              | high-freq                           | 12          | 903             | organizacija    | ajicazinagro     | ajicanizirgo       | ajicanizirgo                               |
| 208           | 167                                   | forwards              | pseudo                              | 13          | 0               | balranemdalan   | naladmenarlab    | naladmeralab       | naladmeralab                               |
| 209           | 90                                    | forwards              | pseudo                              | 13          | 0               | olkamizađioni   | inoiđazimaklo    | inoziadiolko       | inoziadiolko                               |
| 210           | 143                                   | forwards              | pseudo                              | 13          | 0               | namidezdacija   | ajicadzediman    | ajitsadzineman     | ajitsadzineman                             |
| 211           | 144                                   | forwards              | low-freq                            | 13          | 1               | eksplikativan   | navitakilpske    | natsitalipkske     | natsitalipkske                             |
| 212           | 8                                     | forwards              | low-freq                            | 13          | 1               | meteorologija   | ajigoloroetem    | ajigoloroetem      |                                            |
| 213           | 200                                   | forwards              | low-freq                            | 13          | 1               | orijentaciono   | onoicatnejiro    | oniacorinjetso     | oniacorinjetsko                            |
| 214           | 14                                    | forwards              | high-freq                           | 13          | 36              | kvalifikacija   | ajicakifilavk    | ajicakilifavk      | ajicakilifalk                              |
| 215           | 71                                    | forwards              | high-freq                           | 13          | 52              | manifestacija   | ajicatsefinam    | ajicefacinam       | ajicefacinam                               |
| 216           | 26                                    | forwards              | high-freq                           | 13          | 52              | organizacioni   | inoicazinagro    | inocaizorgo        | inocaizorgo                                |
| 217           | 80                                    | forwards              | pseudo                              | 14          | 0               | lebrezembakija  | ajikabmezerbel   | NEXT               | NEXT                                       |
| 218           | 110                                   | forwards              | pseudo                              | 14          | 0               | atnimiklamcija  | ajicmalkiminta   | ajicakilipmapab    | ajicakilipmapab                            |
| 219           | 88                                    | forwards              | pseudo                              | 14          | 0               | teolkamitacija  | ajicatimakloet   | ajicakilteopok     | ajicakilteopok                             |
| 220           | 24                                    | forwards              | low-freq                            | 14          | 1               | ekspresionista  | atsinoiserpske   | atsoinerkspe       | atsoinerkspe                               |
| 221           | 28                                    | forwards              | low-freq                            | 14          | 1               | velikoposednik  | kindesopokilev   | kindesopokilev     |                                            |
| 222           | 162                                   | forwards              | low-freq                            | 14          | 1               | naturalizacija  | ajicazilarutan   | ajicazurilitan     | ajicazurilitan                             |
| 223           | 86                                    | forwards              | high-freq                           | 14          | 19              | interpretacija  | ajicaterpretni   | ajicaterpretni     |                                            |
| 224           | 94                                    | forwards              | high-freq                           | 14          | 27              | zainteresovati  | itavoseretniaz   | itasovoeretsni     | itasovoeretsni                             |
| 225           | 141                                   | forwards              | high-freq                           | 14          | 57              | reorganizacija  | ajicazinagroer   | ajicanozorgioer    | ajicanozorgioer                            |
| 226           | 198                                   | forwards              | pseudo                              | 15          | 0               | arminizdrapilan | nalipardzinimra  | NEXT               | NEXT                                       |
| 227           | 111                                   | forwards              | pseudo                              | 15          | 0               | lebrezendaminac | canimadnezerbel  | canizarebmilda     | canizarebmilda                             |
| 228           | 124                                   | forwards              | pseudo                              | 15          | 0               | bastukobromstvo | ovtsmorbokutsab  | ovtsnogultmab      | ovtsnogultmab                              |
| 229           | 164                                   | forwards              | low-freq                            | 15          | 1               | profesionalizam | mazilanoiseforp  | mazilanoifesorp    | mazilanoifesorp                            |
| 230           | 108                                   | forwards              | low-freq                            | 15          | 1               | diskvalifikovan | navokifilavksid  | navokilafhoksfid   | navokilafhoksfid                           |
| 231           | 214                                   | forwards              | low-freq                            | 15          | 1               | idolopoklonstvo | ovtsnolkopolodi  | ovtsnodolodi       | ovtsnodolodi                               |

| No of stimuli | Order in which stimuli were presented | Forwards or Backwards | Low/High-Frequency- or Pseudo-words | Word length | Lemma frequency | Stimulus        | Correct response | Proband's response | Proband's response when she is not correct |
|---------------|---------------------------------------|-----------------------|-------------------------------------|-------------|-----------------|-----------------|------------------|--------------------|--------------------------------------------|
| 232           | 215                                   | forwards              | high-freq                           | 15          | 12              | poslastičarnica | acinračitsalsop  | acinračitsolap     | acinračitsolap                             |
| 233           | 199                                   | forwards              | high-freq                           | 15          | 17              | elektrotehnički | ikčinhertortkele | ikčinhertortkele   |                                            |
| 234           | 17                                    | forwards              | high-freq                           | 15          | 25              | internacionalan | nalanoicanretni  | nailaconretni      | nailaconretni                              |

**Table S6.** Lexical decision task reaction time of the proband and father.

|                                       | <b>Proband</b>       |                       |                     |
|---------------------------------------|----------------------|-----------------------|---------------------|
|                                       | <b>Forward-words</b> | <b>Backward-words</b> | <b>Pseudo-words</b> |
|                                       | <b>RT (SD)</b>       | <b>RT (SD)</b>        | <b>RT (SD)</b>      |
| <b>Visual lexical decision task</b>   | 662 (170)            | 979 (164)*            | 982 (185)*          |
| <b>Auditory lexical decision task</b> | 874 (101)            | 1996 (577)#           | 1896 (541)#         |
|                                       | <b>Father</b>        |                       |                     |
| <b>Auditory lexical decision task</b> | 523 (274)            | 1617 (540)#           | 1736 (412)#         |

Mean values of reaction time (RT) are given in milliseconds (ms) and standard deviations can be found in the brackets.

\* significantly different from visual lexical decision task, forward condition

# significantly different from auditory lexical decision task, forward condition

**Table S7.** Error rates and processing latencies of the proband as observed in visual lexical decision task and auditory lexical decision task.

| <b>Visual lexical decision task - Processing Latency</b> |               |           |               |           |
|----------------------------------------------------------|---------------|-----------|---------------|-----------|
|                                                          | Forward-words |           | Reverse-words |           |
|                                                          | Abstract      | Concrete  | Abstract      | Concrete  |
| High frequency                                           | 609 (93)      | 596 (77)  | 1051 (177)    | 939 (143) |
| Low frequency                                            | 776 (277)     | 675 (114) | 958 (125)     | 975 (196) |

  

| <b>Visual lexical decision task - Error %</b> |               |          |               |          |
|-----------------------------------------------|---------------|----------|---------------|----------|
|                                               | Forward-words |          | Reverse-words |          |
|                                               | Abstract      | Concrete | Abstract      | Concrete |
| High frequency                                | 0             | 0        | 33.333        | 20       |
| Low frequency                                 | 6.667         | 0        | 40            | 20       |

  

| <b>Auditory lexical decision task- Processing Latency</b> |               |           |               |            |
|-----------------------------------------------------------|---------------|-----------|---------------|------------|
|                                                           | Forward-words |           | Reverse-words |            |
|                                                           | Abstract      | Concrete  | Abstract      | Concrete   |
| High frequency                                            | 878 (83)      | 849 (111) | 2001 (557)    | 1856 (503) |
| Low frequency                                             | 911 (133)     | 857 (71)  | 2279 (620)    | 1943 (625) |

  

| <b>Auditory lexical decision task- Error %</b> |               |          |               |          |
|------------------------------------------------|---------------|----------|---------------|----------|
|                                                | Forward-words |          | Reverse-words |          |
|                                                | Abstract      | Concrete | Abstract      | Concrete |
| High frequency                                 | 0             | 13.333   | 13.333        | 0        |
| Low frequency                                  | 13.333        | 6.667    | 33.333        | 0        |

Processing latencies are given in milliseconds (ms) and standard deviations can be found in the brackets. Error is given as % responses incorrect.

**Table S8.** Results of the analyses of errors and response latencies of the proband as observed in visual lexical decision task and auditory lexical decision task.

| <b>Visual lexical decision task – Response latencies</b>   |             |           |        |          |
|------------------------------------------------------------|-------------|-----------|--------|----------|
|                                                            | Coefficient | Std Error | t      | P (> t ) |
| Intercept                                                  | 6.8845      | 0.0394    | 174.92 | <0.0001  |
| Grapheme/phoneme sequence<br>(Forward)                     | -0.4928     | 0.0518    | -9.51  | <0.0001  |
| Frequency (Low)                                            | -0.023      | 0.0563    | -0.41  | 0.6844   |
| Grapheme/phoneme sequence<br>(Forward) x Frequency (Low)   | 0.1834      | 0.074     | 2.48   | 0.015    |
| <b>Visual lexical decision task – Errors (%)</b>           |             |           |        |          |
|                                                            | Coefficient | Std Error | Wald Z | P(> Z )  |
| Intercept                                                  | 0.928       | 0.2865    | 3.24   | 0.0012   |
| Grapheme/phoneme sequence<br>(Forward)                     | 3.1495      | 1.0483    | 3      | 0.0027   |
| <b>Auditory lexical decision task – Response Latencies</b> |             |           |        |          |
|                                                            | Coefficient | Std Error | t      | P(> t )  |
| Intercept                                                  | 7.5591      | 0.0295    | 256.66 | <0.0001  |
| Grapheme/phoneme sequence<br>(Forward)                     | -0.7929     | 0.0413    | -19.21 | <0.0001  |
| <b>Auditory lexical decision task – Errors (%)</b>         |             |           |        |          |
|                                                            | Coefficient | Std Error | Wald Z | P(> Z )  |
| Intercept                                                  | 1.7346      | 0.3616    | 4.8    | <0.0001  |
| Concreteness (Concrete)                                    | 1.6327      | 0.805     | 2.03   | 0.0425   |

For each analysis the logistic regression coefficient, standard error value (Std Error), t-value (t) or Wald Z score (Wald Z), and P value are given.

**Table S9.** Coefficients from logistic regression model of control group's (n=6) accuracy in dual task.

|                                                                      | Coefficient | Std error | Wald Z | Pr(> Z ) |
|----------------------------------------------------------------------|-------------|-----------|--------|----------|
| Intercept (Test condition: Baseline, Word direction: Backward)       | -0.0533     | 0.1634    | -0.33  | 0.744    |
| Test condition (Visual matrices)                                     | 0.0800      | 0.231     | 0.35   | 0.729    |
| Test condition (Random number generation)                            | -1.2918     | 0.2595    | -4.98  | <0.0001  |
| Test condition (Number series)                                       | -0.7004     | 0.2394    | -2.93  | 0.0034   |
| Test condition (Num-pad sequence)                                    | -1.6553     | 0.2794    | -5.93  | <0.0001  |
| Test condition (Corsi block tapping task)                            | -0.0534     | 0.2311    | -0.23  | 0.8172   |
| Test condition (de-da)                                               | -1.3329     | 0.2614    | -5.1   | <0.0001  |
| Word direction (Forward)                                             | 3.6507      | 0.5325    | 6.86   | <0.0001  |
| Test condition (Visual matrices) x Word direction (Forward)          | -0.4993     | 0.6956    | -0.72  | 0.4729   |
| Test condition (Random number generation) x Word direction (Forward) | -2.0644     | 0.5927    | -3.48  | 0.0005   |
| Test condition (Number series) x Word direction (Forward)            | -0.8398     | 0.6169    | -1.36  | 0.1734   |
| Test condition (Num-pad sequence) x Word direction (Forward)         | -0.896      | 0.6079    | -1.47  | 0.1405   |
| Test condition (Corsi block tapping task) x Word direction (Forward) | -1.1015     | 0.6331    | -1.74  | 0.0819   |
| Test condition (de-da) x Word direction (Forward)                    | -0.6549     | 0.6109    | -1.07  | 0.2837   |

For each analysis the logistic regression coefficient, standard error value (Std Error), Wald Z score (Wald Z), and P value (Pr(>|Z|)) are given.



**Table S10.** Coefficients from logistic regression model for the accuracy of the proband in dual task.

|                                                                      | Coef.   | Std error | Wald Z | Pr(> Z ) |
|----------------------------------------------------------------------|---------|-----------|--------|----------|
| Intercept (Test condition: Baseline, Word direction: Backward)       | 1.9924  | 0.6155    | 3.24   | 0.0012   |
| Test condition (Visual matrices)                                     | -1.7513 | 0.7356    | -2.38  | 0.0173   |
| Test condition (Random number generation)                            | -3.9849 | 0.8704    | -4.58  | <0.0001  |
| Test condition (Number series)                                       | -1.5870 | 0.7385    | -2.15  | 0.0317   |
| Test condition (Num-pad sequence)                                    | -4.4348 | 0.9603    | -4.62  | <0.0001  |
| Test condition (Corsi block tapping task)                            | -1.7513 | 0.7356    | -2.38  | 0.0173   |
| Test condition (de-da)                                               | -1.9124 | 0.7342    | -2.6   | 0.0092   |
| Word direction (Forward)                                             | 1.1856  | 1.1918    | 0.99   | 0.3198   |
| Test condition (Visual matrices) x Word direction (Forward)          | 1.0156  | 1.4582    | 0.7    | 0.4861   |
| Test condition (Random number generation) x Word direction (Forward) | 0.7268  | 1.3998    | 0.52   | 0.6036   |
| Test condition (Number series) x Word direction (Forward)            | 8.7585  | 35.3748   | 0.25   | 0.8045   |
| Test condition (Num-pad sequence) x Word direction (Forward)         | 1.4979  | 1.4582    | 1.03   | 0.3043   |
| Test condition (Corsi block tapping task) x Word direction (Forward) | 8.9228  | 35.3748   | 0.25   | 0.8009   |
| Test condition (de-da) x Word direction (Forward)                    | 9.0839  | 35.3747   | 0.26   | 0.7973   |

For each analysis the logistic regression coefficient, standard error value (Std Error), Wald Z score (Wald Z), and P value (Pr(>|Z|)) are given.

**Table S11.** Proband: fMRI coordinates for areas active in forward- or backward-condition.

| Area                             | Forward |     |     |     | Backward |     |     |     |
|----------------------------------|---------|-----|-----|-----|----------|-----|-----|-----|
|                                  | z-score | MNI |     |     | z-score  | MNI |     |     |
|                                  |         | x   | y   | z   |          | x   | y   | z   |
| Supplementary motor area         | 5.32    | -4  | 6   | 54  | 7.49     | -4  | 6   | 54  |
| Primary motor (left)             | 4.04    | -52 | 4   | 16  | 7.29     | -52 | -6  | 28  |
| Primary motor (right)            | NA      | /   | /   | /   | 4.41     | 58  | -4  | 30  |
| Parietal (left)                  | 5.50    | -28 | -58 | 38  | 9.19     | -22 | -72 | 54  |
| Occipital                        | 4.74    | 4   | -88 | 26  | 5.99     | -24 | -82 | 22  |
| Inferior frontal gyrus (left)    | 4.38    | -58 | 6   | 12  | 6.32     | -52 | 4   | 16  |
| Prefrontal area                  | 3.68    | -38 | 30  | 34  | 4.72     | -32 | 34  | 36  |
| Prefrontal gyrus                 | NA      | /   | /   | /   | 4.86     | -44 | 30  | 4   |
| Superior temporal gyrus (left)   | 6.01    | -50 | -44 | 22  | 8.08     | -50 | -42 | 22  |
| Medial temporal posterior (left) | 4.45    | -54 | -58 | 6   | 5.92     | -52 | -58 | 2   |
| Fusiform gyrus (left)            | NA      | /   | /   | /   | 7.20     | -42 | -72 | -14 |
| Cerebellum (right)               | 3.19    | 34  | -74 | -26 | 5.94     | 36  | -70 | -30 |
| Cerebellum (left)                | 2.91    | -46 | -64 | -24 | 2.80     | -40 | -48 | -34 |

\*NA – not available

**Table S12.** Proband: fMRI coordinates for areas highly active only in forward- or backward-condition.

| <i>Forward-“speech” – Backward-“speech”</i> |                |            |          |          |
|---------------------------------------------|----------------|------------|----------|----------|
| <b>Area</b>                                 | <b>z-score</b> | <b>MNI</b> |          |          |
|                                             |                | <b>X</b>   | <b>Y</b> | <b>Z</b> |
| Parietal cortex (left)                      | 4.58           | -50        | -64      | 40       |
| Parietal cortex (right)                     | 3.04           | 54         | -54      | 46       |
| Frontal cortex (medial)                     | 3.07           | -2         | 54       | -4       |
| Anterior cingulate cortex                   | 3.83           | -2         | 40       | 14       |
| Posterior cingulate cortex                  | 3.88           | -10        | -46      | 34       |
| <i>Backward-“speech” – Forward-“speech”</i> |                |            |          |          |
| <b>Area</b>                                 | <b>z-score</b> | <b>MNI</b> |          |          |
|                                             |                | <b>X</b>   | <b>Y</b> | <b>Z</b> |
| Parietal cortex (left)                      | 4.62           | -36        | -44      | 52       |
| Prefrontal cortex (left)                    | 3.96           | -44        | 30       | 6        |
| Primary motor area (left)                   | 4.60           | -46        | -12      | 32       |
| Inferior frontal gyrus (left)               | 4.62           | -58        | -4       | 18       |
| Supramarginal gyrus (left)                  | 3.84           | -60        | -34      | 32       |
| Superior temporal gyrus (left)              | 3.82           | -58        | -40      | 26       |
| Fusiform gyrus (left)                       | 4.65           | -46        | -72      | -14      |
| Primary motor area (right)                  | 3.96           | 52         | -4       | 28       |
| Inferior frontal gyrus (right)              | 4.74           | 60         | 0        | 16       |

The areas significantly more active in the forward and backward-“speech” conditions are shown in the upper and bottom part of the table, respectively. The corresponding Z-scores and MNI coordinates are shown next to the area name.

**Table S13.** Exome sequencing metrics

**Lane Metrics**

| Lane | Length | Tiles | Clusters | % clusters that passed filters | Yield (Mb) | Yield (Mb Q20) | % Mapped | % Coverage (genome) | % Primer | % Broken | % Variants  | Hets   |
|------|--------|-------|----------|--------------------------------|------------|----------------|----------|---------------------|----------|----------|-------------|--------|
| 1    | 100    | 96    | 2487665  | 93.1                           | 21839.52   | 21175.27       | 92.2     | 12.5                | 0        | 4.9      | 0.39 ± 0.00 | 0.0027 |

| Lane | Mean coverage | % high coverage | % dups | % pair dups | % GC       | % GC <sub>mapped</sub> | % exonic | % exon coverage | % low Quality <sub>end</sub> | avgQuality |
|------|---------------|-----------------|--------|-------------|------------|------------------------|----------|-----------------|------------------------------|------------|
| 1    | 8.59          | 5.65            | 27.66  | 15.62       | 46.3 ± 9.7 | 46.4 ± 10.1            | 31.9     | 99.7            | 0                            | 35.9       |

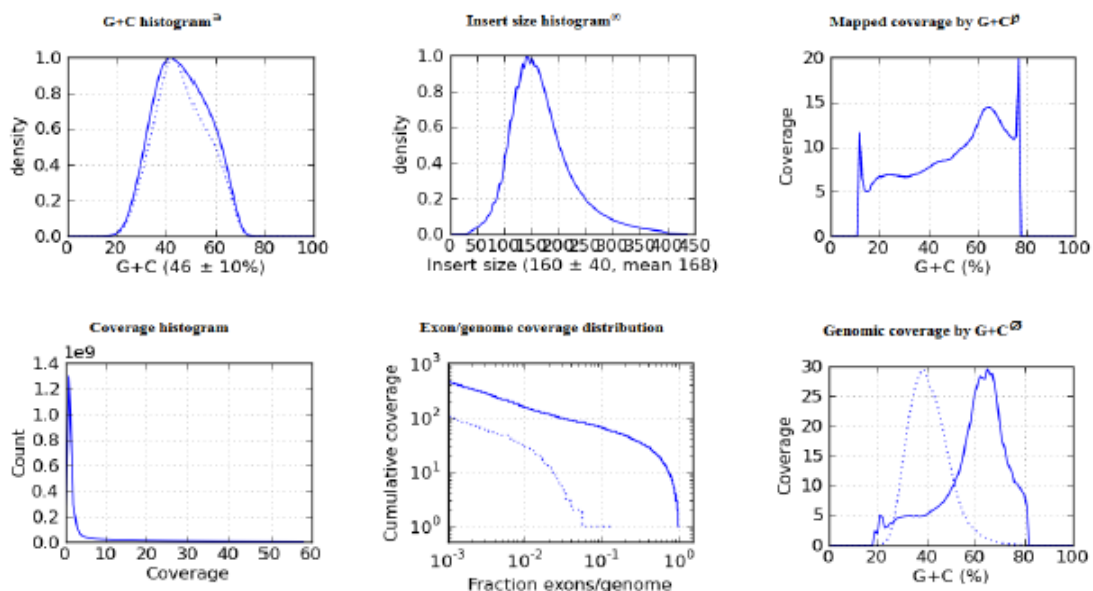

**Sample Metrics**

| Sample name | Mean cvg | Median cvg | % > 10X | % > 20X | Exonic mean coverage | Exonic median coverage | Exonic % > 10X | Exonic % > 20X |
|-------------|----------|------------|---------|---------|----------------------|------------------------|----------------|----------------|
| Father      | 4.24     | 1          | 1.6     | 0.7     | 13.88                | 11                     | 56.3           | 24.2           |
| Daughter 1  | 8.45     | 1          | 2.9     | 2.1     | 38.74                | 35                     | 87.6           | 75             |
| Daughter 2  | 6.37     | 1          | 2.4     | 1.4     | 22.76                | 20                     | 80.1           | 51.7           |
| Cousin 1    | 9.82     | 1          | 3.1     | 2.3     | 47.74                | 44                     | 89.8           | 80.6           |
| Cousin 2    | 3.55     | 1          | 1.4     | 0.5     | 11.81                | 9                      | 46.6           | 17.9           |
| Mother      | 6.86     | 1          | 2.8     | 2       | 34.89                | 31                     | 88.2           | 71.6           |
| Average     | 6.55     | 1.00       | 2.37    | 1.50    | 28.30                | 25.00                  | 74.77          | 53.50          |

**Table S14.** Predicted effects of shared variants of putative significance that validated.

| Variant<br>(chr:posn)<br>(hg19) | Gene         | Ref | Variant | exon: cDNAchange:<br>AAChange | Poly<br>Phen2<br>HDIV | Poly<br>Phen2<br>HVAR | LRT          | Mutatio<br>nTaster | Mutatio<br>n<br>Assessor | Phylo<br>P   | Phast<br>Cons | SIFT        |
|---------------------------------|--------------|-----|---------|-------------------------------|-----------------------|-----------------------|--------------|--------------------|--------------------------|--------------|---------------|-------------|
| g.11:8161603                    | <i>RIC3</i>  | C   | T       | exon2: c.G262A: p.G88R        | <b>0.999</b>          | <b>0.974</b>          | 0.003        | <b>0.514</b>       | <b>1.995</b>             | <b>2.625</b> | <b>597</b>    | <b>0.03</b> |
| g.6:3105973                     | <i>RIPK1</i> | C   | G       | exon8: c.C1264G:<br>p.Q422E   | 0.082                 | 0.036                 | 0.119        | .                  | 1.78                     | <b>2.641</b> | <b>476</b>    | 0.18        |
| g.15:28491062                   | <i>HERC2</i> | T   | A       | exon23: c.A3542T:<br>p.D1181V | <b>0.999</b>          | <b>0.996</b>          | <b>0.000</b> | <b>0.999</b>       | 1.61                     | <b>2.274</b> | <b>559</b>    | 0.38        |
| g.11:10874596                   | <i>ZBED5</i> | G   | A       | exon3: c.C1897T:<br>p.R633C   | <b>1.000</b>          | <b>0.967</b>          | .            | .                  | 1.895                    | <b>1.168</b> | <b>731</b>    | <b>0.01</b> |

Predicted effects that are significant are shown in bold

**Table S15.** UbPred Predictions

| Gene         | Isoform          | Residue    | Wild-type sequence |                          | Variant Sequence |                          | $\Delta$ score |
|--------------|------------------|------------|--------------------|--------------------------|------------------|--------------------------|----------------|
|              |                  |            | Score              | Ubiquitinated?           | Score            | Ubiquitinated?           |                |
| ZBED5        | NP_067034        | 24         | 0.55               | No                       | 0.55             | No                       | 0              |
| ZBED5        | NP_067034        | 41         | 0.64               | Low confidence           | 0.64             | Low confidence           | 0              |
| ZBED5        | NP_067034        | 46         | 0.58               | No                       | 0.59             | No                       | 0.01           |
| ZBED5        | NP_067034        | 64         | 0.94               | High confidence          | 0.92             | High confidence          | 0.02           |
| ZBED5        | NP_067034        | 73         | 0.74               | Medium confidence        | 0.73             | Medium confidence        | 0.01           |
| ZBED5        | NP_067034        | 81         | 0.91               | High confidence          | 0.91             | High confidence          | 0              |
| ZBED5        | NP_067034        | 82         | 0.86               | High confidence          | 0.86             | High confidence          | 0              |
| ZBED5        | NP_067034        | 91         | 0.31               | No                       | 0.32             | No                       | 0.01           |
| ZBED5        | NP_067034        | 98         | 0.16               | No                       | 0.18             | No                       | 0.02           |
| ZBED5        | NP_067034        | 103        | 0.08               | No                       | 0.1              | No                       | 0.02           |
| ZBED5        | NP_067034        | 104        | 0.1                | No                       | 0.1              | No                       | 0              |
| ZBED5        | NP_067034        | 106        | 0.15               | No                       | 0.14             | No                       | 0.01           |
| ZBED5        | NP_067034        | 109        | 0.39               | No                       | 0.39             | No                       | 0              |
| ZBED5        | NP_067034        | 136        | 0.38               | No                       | 0.39             | No                       | 0.01           |
| ZBED5        | NP_067034        | 137        | 0.34               | No                       | 0.34             | No                       | 0              |
| ZBED5        | NP_067034        | 148        | 0.14               | No                       | 0.14             | No                       | 0              |
| ZBED5        | NP_067034        | 156        | 0.21               | No                       | 0.23             | No                       | 0.02           |
| ZBED5        | NP_067034        | 161        | 0.45               | No                       | 0.45             | No                       | 0              |
| ZBED5        | NP_067034        | 163        | 0.79               | Medium confidence        | 0.77             | Medium confidence        | 0.02           |
| <b>ZBED5</b> | <b>NP_067034</b> | <b>169</b> | <b>0.82</b>        | <b>Medium confidence</b> | <b>0.85</b>      | <b>High confidence</b>   | <b>0.03</b>    |
| ZBED5        | NP_067034        | 179        | 0.89               | High confidence          | 0.89             | High confidence          | 0              |
| <b>ZBED5</b> | <b>NP_067034</b> | <b>184</b> | <b>0.88</b>        | <b>High confidence</b>   | <b>0.81</b>      | <b>Medium confidence</b> | <b>0.07</b>    |
| ZBED5        | NP_067034        | 219        | 0.42               | No                       | 0.37             | No                       | 0.05           |
| ZBED5        | NP_067034        | 223        | 0.44               | No                       | 0.43             | No                       | 0.01           |
| ZBED5        | NP_067034        | 236        | 0.54               | No                       | 0.54             | No                       | 0              |
| ZBED5        | NP_067034        | 237        | 0.45               | No                       | 0.44             | No                       | 0.01           |
| ZBED5        | NP_067034        | 253        | 0.53               | No                       | 0.55             | No                       | 0.02           |
| ZBED5        | NP_067034        | 268        | 0.41               | No                       | 0.42             | No                       | 0.01           |
| ZBED5        | NP_067034        | 299        | 0.55               | No                       | 0.54             | No                       | 0.01           |
| ZBED5        | NP_067034        | 330        | 0.5                | No                       | 0.51             | No                       | 0.01           |
| ZBED5        | NP_067034        | 337        | 0.48               | No                       | 0.41             | No                       | 0.07           |
| ZBED5        | NP_067034        | 352        | 0.48               | No                       | 0.52             | No                       | 0.04           |
| ZBED5        | NP_067034        | 361        | 0.42               | No                       | 0.41             | No                       | 0.01           |
| ZBED5        | NP_067034        | 382        | 0.3                | No                       | 0.31             | No                       | 0.01           |
| ZBED5        | NP_067034        | 389        | 0.37               | No                       | 0.39             | No                       | 0.02           |
| ZBED5        | NP_067034        | 403        | 0.16               | No                       | 0.11             | No                       | 0.05           |
| ZBED5        | NP_067034        | 413        | 0.43               | No                       | 0.41             | No                       | 0.02           |
| ZBED5        | NP_067034        | 439        | 0.21               | No                       | 0.22             | No                       | 0.01           |
| ZBED5        | NP_067034        | 483        | 0.41               | No                       | 0.43             | No                       | 0.02           |
| ZBED5        | NP_067034        | 494        | 0.64               | Low confidence           | 0.64             | Low confidence           | 0              |
| ZBED5        | NP_067034        | 504        | 0.42               | No                       | 0.44             | No                       | 0.02           |
| ZBED5        | NP_067034        | 511        | 0.36               | No                       | 0.4              | No                       | 0.04           |
| ZBED5        | NP_067034        | 543        | 0.57               | No                       | 0.59             | No                       | 0.02           |
| ZBED5        | NP_067034        | 562        | 0.45               | No                       | 0.46             | No                       | 0.01           |
| ZBED5        | NP_067034        | 583        | 0.61               | No                       | 0.55             | No                       | 0.06           |
| <b>ZBED5</b> | <b>NP_067034</b> | <b>605</b> | <b>0.69</b>        | <b>Medium confidence</b> | <b>0.68</b>      | <b>Low confidence</b>    | <b>0.01</b>    |
| ZBED5        | NP_067034        | 655        | 0.35               | No                       | 0.38             | No                       | 0.03           |
| ZBED5        | NP_067034        | 657        | 0.33               | No                       | 0.34             | No                       | 0.01           |
| ZBED5        | NP_067034        | 660        | 0.12               | No                       | 0.13             | No                       | 0.01           |
| ZBED5        | NP_067034        | 680        | 0.11               | No                       | 0.11             | No                       | 0              |
| ZBED5        | NP_067034        | 685        | 0.07               | No                       | 0.07             | No                       | 0              |
| ZBED5        | NP_067034        | 686        | 0.07               | No                       | 0.07             | No                       | 0              |
| ZBED5        | NP_067034        | 689        | 0.13               | No                       | 0.12             | No                       | 0.01           |

| Gene                | Isoform          | Wild-type sequence |             |                          | Variant Sequence |                          |                |
|---------------------|------------------|--------------------|-------------|--------------------------|------------------|--------------------------|----------------|
|                     |                  | Residue            | Score       | Ubiquitinated?           | Score            | Ubiquitinated?           | $\Delta$ score |
| <i>RIPK1</i>        | NP_003795        | 11                 | 0.58        | No                       | 0.58             | No                       | 0              |
| <i>RIPK1</i>        | NP_003795        | 13                 | 0.52        | No                       | 0.59             | No                       | 0.07           |
| <i>RIPK1</i>        | NP_003795        | 30                 | 0.46        | No                       | 0.48             | No                       | 0.02           |
| <i>RIPK1</i>        | NP_003795        | 45                 | 0.37        | No                       | 0.38             | No                       | 0.01           |
| <i>RIPK1</i>        | NP_003795        | 49                 | 0.33        | No                       | 0.41             | No                       | 0.08           |
| <i>RIPK1</i>        | NP_003795        | 65                 | 0.49        | No                       | 0.46             | No                       | 0.03           |
| <i>RIPK1</i>        | NP_003795        | 77                 | 0.28        | No                       | 0.29             | No                       | 0.01           |
| <i>RIPK1</i>        | NP_003795        | 87                 | 0.38        | No                       | 0.4              | No                       | 0.02           |
| <i>RIPK1</i>        | NP_003795        | 97                 | 0.44        | No                       | 0.44             | No                       | 0              |
| <i>RIPK1</i>        | NP_003795        | 105                | 0.44        | No                       | 0.4              | No                       | 0.04           |
| <i>RIPK1</i>        | NP_003795        | 115                | 0.25        | No                       | 0.27             | No                       | 0.02           |
| <i>RIPK1</i>        | NP_003795        | 132                | 0.31        | No                       | 0.31             | No                       | 0              |
| <i>RIPK1</i>        | NP_003795        | 137                | 0.36        | No                       | 0.37             | No                       | 0.01           |
| <i>RIPK1</i>        | NP_003795        | 140                | 0.42        | No                       | 0.44             | No                       | 0.02           |
| <i>RIPK1</i>        | NP_003795        | 153                | 0.32        | No                       | 0.31             | No                       | 0.01           |
| <i>RIPK1</i>        | NP_003795        | 163                | 0.34        | No                       | 0.3              | No                       | 0.04           |
| <i>RIPK1</i>        | NP_003795        | 167                | 0.61        | No                       | 0.54             | No                       | 0.07           |
| <b><i>RIPK1</i></b> | <b>NP_003795</b> | <b>184</b>         | <b>0.66</b> | <b>Low confidence</b>    | <b>0.69</b>      | <b>Medium confidence</b> | <b>0.03</b>    |
| <b><i>RIPK1</i></b> | <b>NP_003795</b> | <b>185</b>         | <b>0.68</b> | <b>Low confidence</b>    | <b>0.7</b>       | <b>Medium confidence</b> | <b>0.02</b>    |
| <b><i>RIPK1</i></b> | <b>NP_003795</b> | <b>204</b>         | <b>0.69</b> | <b>Medium confidence</b> | <b>0.63</b>      | <b>Low confidence</b>    | <b>0.06</b>    |
| <i>RIPK1</i>        | NP_003795        | 208                | 0.5         | No                       | 0.5              | No                       | 0              |
| <i>RIPK1</i>        | NP_003795        | 225                | 0.33        | No                       | 0.32             | No                       | 0.01           |
| <i>RIPK1</i>        | NP_003795        | 242                | 0.28        | No                       | 0.25             | No                       | 0.03           |
| <i>RIPK1</i>        | NP_003795        | 265                | 0.4         | No                       | 0.39             | No                       | 0.01           |
| <i>RIPK1</i>        | NP_003795        | 284                | 0.57        | No                       | 0.5              | No                       | 0.07           |
| <b><i>RIPK1</i></b> | <b>NP_003795</b> | <b>302</b>         | <b>0.7</b>  | <b>Medium confidence</b> | <b>0.66</b>      | <b>Low confidence</b>    | <b>0.04</b>    |
| <i>RIPK1</i>        | NP_003795        | 305                | 0.64        | Low confidence           | 0.63             | Low confidence           | 0.01           |
| <i>RIPK1</i>        | NP_003795        | 306                | 0.67        | Low confidence           | 0.68             | Low confidence           | 0.01           |
| <i>RIPK1</i>        | NP_003795        | 316                | 0.81        | Medium confidence        | 0.8              | Medium confidence        | 0.01           |
| <i>RIPK1</i>        | NP_003795        | 377                | 0.94        | High confidence          | 0.86             | High confidence          | 0.08           |
| <i>RIPK1</i>        | NP_003795        | 396                | 0.27        | No                       | 0.22             | No                       | 0.05           |
| <i>RIPK1</i>        | NP_003795        | 435                | 0.84        | High confidence          | 0.88             | High confidence          | 0.04           |
| <i>RIPK1</i>        | NP_003795        | 530                | 0.53        | No                       | 0.57             | No                       | 0.04           |
| <i>RIPK1</i>        | NP_003795        | 565                | 0.72        | Medium confidence        | 0.78             | Medium confidence        | 0.06           |
| <b><i>RIPK1</i></b> | <b>NP_003795</b> | <b>571</b>         | <b>0.71</b> | <b>Medium confidence</b> | <b>0.66</b>      | <b>Low confidence</b>    | <b>0.05</b>    |
| <b><i>RIPK1</i></b> | <b>NP_003795</b> | <b>585</b>         | <b>0.62</b> | <b>Low confidence</b>    | <b>0.6</b>       | <b>No</b>                | <b>0.02</b>    |
| <i>RIPK1</i>        | NP_003795        | 596                | 0.17        | No                       | 0.13             | No                       | 0.04           |
| <i>RIPK1</i>        | NP_003795        | 599                | 0.15        | No                       | 0.14             | No                       | 0.01           |
| <i>RIPK1</i>        | NP_003795        | 604                | 0.33        | No                       | 0.3              | No                       | 0.03           |
| <i>RIPK1</i>        | NP_003795        | 625                | 0.59        | No                       | 0.55             | No                       | 0.04           |
| <i>RIPK1</i>        | NP_003795        | 627                | 0.52        | No                       | 0.46             | No                       | 0.06           |
| <i>RIPK1</i>        | NP_003795        | 634                | 0.19        | No                       | 0.16             | No                       | 0.03           |
| <i>RIPK1</i>        | NP_003795        | 642                | 0.35        | No                       | 0.35             | No                       | 0              |
| <i>RIPK1</i>        | NP_003795        | 648                | 0.34        | No                       | 0.32             | No                       | 0.02           |
| <i>RIC3</i>         | NP_078833        | 25                 | 0.41        | No                       | 0.41             | No                       | 0              |
| <i>RIC3</i>         | NP_078833        | 32                 | 0.62        | Low confidence           | 0.62             | Low confidence           | 0              |
| <i>RIC3</i>         | NP_078833        | 43                 | 0.87        | High confidence          | 0.87             | High confidence          | 0              |
| <b><i>RIC3</i></b>  | <b>NP_078833</b> | <b>78</b>          | <b>0.7</b>  | <b>Medium confidence</b> | <b>0.41</b>      | <b>No</b>                | <b>0.29</b>    |
| <i>RIC3</i>         | NP_078833        | 80                 | 0.68        | Low confidence           | 0.66             | Low confidence           | 0.02           |
| <i>RIC3</i>         | NP_078833        | 117                | 0.31        | No                       | 0.3              | No                       | 0.01           |
| <i>RIC3</i>         | NP_078833        | 120                | 0.3         | No                       | 0.28             | No                       | 0.02           |
| <i>RIC3</i>         | NP_078833        | 122                | 0.46        | No                       | 0.46             | No                       | 0              |
| <i>RIC3</i>         | NP_078833        | 129                | 0.77        | Medium confidence        | 0.77             | Medium confidence        | 0              |
| <i>RIC3</i>         | NP_078833        | 141                | 0.7         | Medium confidence        | 0.7              | Medium confidence        | 0              |
| <b><i>RIC3</i></b>  | <b>NP_078833</b> | <b>153</b>         | <b>0.69</b> | <b>Medium confidence</b> | <b>0.68</b>      | <b>Low confidence</b>    | <b>0.01</b>    |

| Gene               | Isoform             | Wild-type sequence |             |                          | Variant Sequence |                   |             |
|--------------------|---------------------|--------------------|-------------|--------------------------|------------------|-------------------|-------------|
|                    |                     | Residue            | Score       | Ubiquitinated?           | Score            | Ubiquitinated?    | Δ score     |
| <i>RIC3</i>        | NP_078833           | 155                | 0.67        | Low confidence           | 0.67             | Low confidence    | 0           |
| <i>RIC3</i>        | NP_078833           | 163                | 0.66        | Low confidence           | 0.64             | Low confidence    | 0.02        |
| <i>RIC3</i>        | NP_078833           | 184                | 0.56        | No                       | 0.56             | No                | 0           |
| <i>RIC3</i>        | NP_078833           | 198                | 0.34        | No                       | 0.34             | No                | 0           |
| <i>RIC3</i>        | NP_078833           | 201                | 0.46        | No                       | 0.46             | No                | 0           |
| <i>RIC3</i>        | NP_078833           | 210                | 0.7         | Medium confidence        | 0.7              | Medium confidence | 0           |
| <i>RIC3</i>        | NP_078833           | 239                | 0.56        | No                       | 0.56             | No                | 0           |
| <i>RIC3</i>        | NP_078833           | 253                | 0.77        | Medium confidence        | 0.77             | Medium confidence | 0           |
| <i>RIC3</i>        | NP_078833           | 298                | 0.72        | Medium confidence        | 0.72             | Medium confidence | 0           |
| <i>RIC3</i>        | NP_078833           | 334                | 0.82        | Medium confidence        | 0.82             | Medium confidence | 0           |
| <i>RIC3</i>        | NP_078833           | 342                | 0.76        | Medium confidence        | 0.76             | Medium confidence | 0           |
| <i>RIC3</i>        | NP_078833           | 352                | 0.75        | Medium confidence        | 0.75             | Medium confidence | 0           |
| <i>RIC3</i>        | NP_078833           | 361                | 0.38        | No                       | 0.38             | No                | 0           |
| <i>RIC3</i>        | NP_001193600        | 25                 | 0.41        | No                       | 0.41             | No                | 0           |
| <b><i>RIC3</i></b> | <b>NP_001193600</b> | <b>32</b>          | <b>0.62</b> | <b>Low confidence</b>    | <b>0.61</b>      | <b>No</b>         | <b>0.01</b> |
| <i>RIC3</i>        | NP_001193600        | 43                 | 0.89        | High confidence          | 0.88             | High confidence   | 0.01        |
| <b><i>RIC3</i></b> | <b>NP_001193600</b> | <b>78</b>          | <b>0.70</b> | <b>Medium confidence</b> | <b>0.43</b>      | <b>No</b>         | <b>0.27</b> |
| <i>RIC3</i>        | NP_001193600        | 80                 | 0.68        | Low confidence           | 0.65             | Low confidence    | 0.03        |
| <i>RIC3</i>        | NP_001193600        | 117                | 0.31        | No                       | 0.31             | No                | 0           |
| <i>RIC3</i>        | NP_001193600        | 120                | 0.29        | No                       | 0.27             | No                | 0.02        |
| <i>RIC3</i>        | NP_001193600        | 122                | 0.45        | No                       | 0.47             | No                | 0.02        |
| <i>RIC3</i>        | NP_001193600        | 129                | 0.77        | Medium confidence        | 0.77             | Medium confidence | 0           |
| <i>RIC3</i>        | NP_001193600        | 141                | 0.70        | Medium confidence        | 0.69             | Medium confidence | 0.01        |
| <i>RIC3</i>        | NP_001193600        | 153                | 0.73        | Medium confidence        | 0.73             | Medium confidence | 0           |
| <i>RIC3</i>        | NP_001193600        | 155                | 0.66        | Low confidence           | 0.67             | Low confidence    | 0.01        |
| <i>RIC3</i>        | NP_001193600        | 163                | 0.78        | Medium confidence        | 0.78             | Medium confidence | 0           |
| <i>RIC3</i>        | NP_001193600        | 185                | 0.56        | No                       | 0.57             | No                | 0.01        |
| <i>RIC3</i>        | NP_001193600        | 199                | 0.34        | No                       | 0.34             | No                | 0           |
| <i>RIC3</i>        | NP_001193600        | 202                | 0.51        | No                       | 0.51             | No                | 0           |
| <i>RIC3</i>        | NP_001193600        | 211                | 0.76        | Medium confidence        | 0.76             | Medium confidence | 0           |
| <i>RIC3</i>        | NP_001193600        | 240                | 0.55        | No                       | 0.55             | No                | 0           |
| <i>RIC3</i>        | NP_001193600        | 254                | 0.77        | Medium confidence        | 0.77             | Medium confidence | 0           |
| <i>RIC3</i>        | NP_001193600        | 299                | 0.72        | Medium confidence        | 0.71             | Medium confidence | 0.01        |
| <i>RIC3</i>        | NP_001193600        | 335                | 0.82        | Medium confidence        | 0.82             | Medium confidence | 0           |
| <i>RIC3</i>        | NP_001193600        | 343                | 0.76        | Medium confidence        | 0.76             | Medium confidence | 0           |
| <i>RIC3</i>        | NP_001193600        | 353                | 0.75        | Medium confidence        | 0.75             | Medium confidence | 0           |
| <i>RIC3</i>        | NP_001193600        | 362                | 0.38        | No                       | 0.38             | No                | 0           |
| <i>RIC3</i>        | NP_001193601        | 25                 | 0.43        | No                       | 0.43             | No                | 0           |
| <i>RIC3</i>        | NP_001193601        | 32                 | 0.65        | Low confidence           | 0.65             | Low confidence    | 0           |
| <i>RIC3</i>        | NP_001193601        | 43                 | 0.87        | High confidence          | 0.87             | High confidence   | 0           |
| <b><i>RIC3</i></b> | <b>NP_001193601</b> | <b>78</b>          | <b>0.65</b> | <b>Low confidence</b>    | <b>0.39</b>      | <b>No</b>         | <b>0.26</b> |
| <b><i>RIC3</i></b> | <b>NP_001193601</b> | <b>80</b>          | <b>0.63</b> | <b>Low confidence</b>    | <b>0.59</b>      | <b>No</b>         | <b>0.04</b> |
| <i>RIC3</i>        | NP_001193601        | 117                | 0.26        | No                       | 0.26             | No                | 0           |
| <i>RIC3</i>        | NP_001193601        | 120                | 0.28        | No                       | 0.27             | No                | 0.01        |
| <i>RIC3</i>        | NP_001193601        | 122                | 0.44        | No                       | 0.45             | No                | 0.01        |
| <i>RIC3</i>        | NP_001193601        | 129                | 0.71        | Medium confidence        | 0.71             | Medium confidence | 0           |
| <i>RIC3</i>        | NP_001193601        | 141                | 0.71        | Medium confidence        | 0.73             | Medium confidence | 0.02        |
| <i>RIC3</i>        | NP_001193601        | 159                | 0.59        | No                       | 0.59             | No                | 0           |
| <i>RIC3</i>        | NP_001193601        | 173                | 0.88        | High confidence          | 0.88             | High confidence   | 0           |
| <i>RIC3</i>        | NP_001193601        | 218                | 0.70        | Medium confidence        | 0.70             | Medium confidence | 0           |
| <i>RIC3</i>        | NP_001193601        | 254                | 0.82        | Medium confidence        | 0.82             | Medium confidence | 0           |
| <i>RIC3</i>        | NP_001193601        | 262                | 0.76        | Medium confidence        | 0.76             | Medium confidence | 0           |
| <i>RIC3</i>        | NP_001193601        | 272                | 0.74        | Medium confidence        | 0.74             | Medium confidence | 0           |
| <i>RIC3</i>        | NP_001193601        | 281                | 0.37        | No                       | 0.37             | No                | 0           |



For each isoform of the gene, ubiquitination signal predictions were compared between the wild type sequence and the variant sequence observed in the backward-speech family. For each lysine residue, a ubiquitination score is given (where 1.0 is the highest likelihood of ubiquitination at this residue). The confidence of the residue being ubiquitinated is also given where lysines with a score  $\geq 0.62$  are likely to be ubiquitinated. Lysines with a score of between 0.62 and 0.69 are predicted to be ubiquitinated with a low level of confidence, lysines with a score of between 0.69 and 0.84 are predicted to be ubiquitinated with a medium level of confidence and lysines with a score of between 0.84 and 1.00 are predicted to be ubiquitinated with a high level of confidence. Sites at which the observed variants resulted in a prediction change are highlighted in bold. The majority of these changes occurred at lysine residues which were near the threshold of confidence intervals. The largest change was observed at residue 78 of RIC3, where the variant resulted in the abolishment of a predicted ubiquitination signal across all three isoforms (change in ubiquitination score ( $\Delta$  score) ranged from 0,26 to 0.29).

**Table S16.** Ubiquitination burden analysis

| <b>exonic and splicing, UTR variants</b> |                    |               |                             |                                             |                |                                       |                |
|------------------------------------------|--------------------|---------------|-----------------------------|---------------------------------------------|----------------|---------------------------------------|----------------|
| Individual                               | No. Genic Variants | No. Genes*    | No. Unique genes/individual | No. Variants in genes interacting with UBC* |                | No. unique genes interacting with UBC |                |
|                                          |                    |               |                             | High confidence                             | Low confidence | High confidence                       | Low confidence |
| II.3 (father)                            | 15602              | 15731         | 8306                        | 5184                                        | 1498           | 2732                                  | 874            |
| III.3 (proband)                          | 27522              | 27741         | 11147                       | 8828                                        | 2593           | 3569                                  | 1151           |
| III.4 (sister)                           | 25144              | 25355         | 10760                       | 8242                                        | 2374           | 3462                                  | 1102           |
| III.1 (cousin 1)                         | 28820              | 29106         | 11427                       | 9358                                        | 2766           | 3637                                  | 1203           |
| III.2 (cousin 2)                         | 10735              | 10827         | 6461                        | 3603                                        | 1145           | 2118                                  | 715            |
| II.4 (mother)                            | 25214              | 25418         | 10815                       | 8189                                        | 2396           | 3471                                  | 1114           |
| <b>Total</b>                             | <b>133037</b>      | <b>134178</b> | <b>58916</b>                | <b>43404</b>                                | <b>12772</b>   | <b>18989</b>                          | <b>6159</b>    |
| <b>TTEST (p)</b>                         |                    |               |                             | <b>0.89</b>                                 | <b>0.87</b>    | <b>0.97</b>                           | <b>0.91</b>    |
| <b>exonic and splicing variants</b>      |                    |               |                             |                                             |                |                                       |                |
| Individual                               | No. Genic Variants | No. Genes*    | No. Unique genes/individual | No. Variants in genes interacting with UBC* |                | No. unique genes interacting with UBC |                |
|                                          |                    |               |                             | High confidence                             | Low confidence | High confidence                       | Low confidence |
| II.3 (father)                            | 10593              | 10654         | 6237                        | 3370                                        | 939            | 1985                                  | 602            |
| III.3 (proband)                          | 18215              | 18306         | 8490                        | 5587                                        | 1580           | 2625                                  | 822            |
| III.4 (sister)                           | 16732              | 16818         | 8181                        | 5243                                        | 1451           | 2539                                  | 771            |
| III.1 (cousin 1)                         | 18645              | 18759         | 8664                        | 5790                                        | 1607           | 2642                                  | 850            |
| III.2 (cousin 2)                         | 7302               | 7348          | 4736                        | 2377                                        | 727            | 1503                                  | 481            |
| II.4 (mother)                            | 16756              | 16840         | 8216                        | 5220                                        | 1467           | 2571                                  | 795            |
| <b>Total</b>                             | <b>88243</b>       | <b>88725</b>  | <b>44524</b>                | <b>27587</b>                                | <b>7771</b>    | <b>13865</b>                          | <b>4321</b>    |
| <b>TTEST (p)</b>                         |                    |               |                             | <b>0.91</b>                                 | <b>0.90</b>    | <b>0.98</b>                           | <b>0.94</b>    |

**exonic or exonic/splicing nonsynonymous variants**

| Individual       | No. Genic Variants | No. Genes*   | No. Unique genes/individual | No. Variants in genes interacting with UBC* |                | No. unique genes interacting with UBC |                |
|------------------|--------------------|--------------|-----------------------------|---------------------------------------------|----------------|---------------------------------------|----------------|
|                  |                    |              |                             | High confidence                             | Low confidence | High confidence                       | Low confidence |
| II.3 (father)    | 4156               | 4189         | 3078                        | 1074                                        | 359            | 804                                   | 274            |
| III.3 (proband)  | 7881               | 7919         | 4875                        | 2027                                        | 683            | 1275                                  | 452            |
| III.4 (sister)   | 7079               | 7113         | 4577                        | 1869                                        | 600            | 1204                                  | 400            |
| III.1 (cousin 1) | 8081               | 8128         | 4962                        | 2114                                        | 685            | 1310                                  | 448            |
| III.2 (cousin 2) | 2794               | 2813         | 2179                        | 763                                         | 260            | 572                                   | 198            |
| II.4 (mother)    | 7058               | 7095         | 4589                        | 1862                                        | 604            | 1228                                  | 412            |
| <b>Total</b>     | <b>37049</b>       | <b>37257</b> | <b>24260</b>                | <b>9709</b>                                 | <b>3191</b>    | <b>6393</b>                           | <b>2184</b>    |
| <b>TTEST (p)</b> |                    |              |                             | <b>0.87</b>                                 | <b>0.94</b>    | <b>0.90</b>                           | <b>0.99</b>    |

**exonic or exonic/splicing frameshift variants**

| Individual       | No. Genic Variants | No. Genes*  | No. Unique genes/individual | No. Variants in genes interacting with UBC* |                | No. unique genes interacting with UBC |                |
|------------------|--------------------|-------------|-----------------------------|---------------------------------------------|----------------|---------------------------------------|----------------|
|                  |                    |             |                             | High confidence                             | Low confidence | High confidence                       | Low confidence |
| II.3 (father)    | 460                | 462         | 441                         | 165                                         | 44             | 160                                   | 42             |
| III.3 (proband)  | 142                | 146         | 136                         | 32                                          | 11             | 28                                    | 11             |
| III.4 (sister)   | 196                | 198         | 186                         | 56                                          | 14             | 53                                    | 14             |
| III.1 (cousin 1) | 129                | 129         | 124                         | 25                                          | 12             | 23                                    | 12             |
| III.2 (cousin 2) | 325                | 325         | 312                         | 123                                         | 42             | 115                                   | 40             |
| II.4 (mother)    | 191                | 191         | 181                         | 57                                          | 19             | 53                                    | 19             |
| <b>Total</b>     | <b>1443</b>        | <b>1451</b> | <b>1380</b>                 | <b>458</b>                                  | <b>142</b>     | <b>432</b>                            | <b>138</b>     |
| <b>TTEST (p)</b> |                    |             |                             | <b>0.71</b>                                 | <b>0.79</b>    | <b>0.71</b>                           | <b>0.80</b>    |

| <b>splicing or exonic/splicing variants</b>   |                    |            |                             |                                             |                |                                       |                |
|-----------------------------------------------|--------------------|------------|-----------------------------|---------------------------------------------|----------------|---------------------------------------|----------------|
| Individual                                    | No. Genic Variants | No. Genes* | No. Unique genes/individual | No. Variants in genes interacting with UBC* |                | No. unique genes interacting with UBC |                |
|                                               |                    |            |                             | High confidence                             | Low confidence | High confidence                       | Low confidence |
| II.3 (father)                                 | 71                 | 71         | 69                          | 22                                          | 7              | 22                                    | 7              |
| III.3 (proband)                               | 110                | 112        | 109                         | 30                                          | 8              | 30                                    | 8              |
| III.4 (sister)                                | 99                 | 100        | 96                          | 25                                          | 8              | 25                                    | 8              |
| III.1 (cousin 1)                              | 112                | 113        | 111                         | 38                                          | 8              | 38                                    | 8              |
| III.2 (cousin 2)                              | 55                 | 55         | 55                          | 18                                          | 7              | 18                                    | 7              |
| II.4 (mother)                                 | 89                 | 89         | 85                          | 27                                          | 5              | 27                                    | 5              |
| <b>Total</b>                                  | <b>536</b>         | <b>540</b> | <b>525</b>                  | <b>160</b>                                  | <b>43</b>      | <b>160</b>                            | <b>43</b>      |
| <b>TTEST (p)</b>                              |                    |            |                             | <b>0.87</b>                                 | <b>0.60</b>    | <b>0.87</b>                           | <b>0.60</b>    |
| <b>exonic stop-gain or stop-loss variants</b> |                    |            |                             |                                             |                |                                       |                |
| Individual                                    | No. Genic Variants | No. Genes* | No. Unique genes/individual | No. Variants in genes interacting with UBC* |                | No. unique genes interacting with UBC |                |
|                                               |                    |            |                             | High confidence                             | Low confidence | High confidence                       | Low confidence |
| II.3 (father)                                 | 27                 | 27         | 27                          | 3                                           | 0              | 3                                     | 0              |
| III.3 (proband)                               | 52                 | 52         | 52                          | 7                                           | 0              | 7                                     | 0              |
| III.4 (sister)                                | 50                 | 50         | 47                          | 8                                           | 0              | 6                                     | 0              |
| III.1 (cousin 1)                              | 53                 | 53         | 52                          | 8                                           | 2              | 7                                     | 2              |
| III.2 (cousin 2)                              | 26                 | 26         | 26                          | 4                                           | 1              | 4                                     | 1              |
| II.4 (mother)                                 | 44                 | 44         | 44                          | 8                                           | 0              | 8                                     | 0              |
| <b>Total</b>                                  | <b>252</b>         | <b>252</b> | <b>248</b>                  | <b>38</b>                                   | <b>3</b>       | <b>35</b>                             | <b>3</b>       |
| <b>TTEST (p)</b>                              |                    |            |                             | <b>0.49</b>                                 | <b>0.22</b>    | <b>0.64</b>                           | <b>0.22</b>    |

| exonic and splicing RARE variants |                    |             |                             |                                             |                |                                       |                |
|-----------------------------------|--------------------|-------------|-----------------------------|---------------------------------------------|----------------|---------------------------------------|----------------|
| Individual                        | No. Genic Variants | No. Genes*  | No. Unique genes/individual | no. Variants in genes interacting with UBC* |                | no. unique genes interacting with UBC |                |
|                                   |                    |             |                             | High confidence                             | Low confidence | High confidence                       | Low confidence |
| II.3 (father)                     | 137                | 140         | 135                         | 37                                          | 17             | 37                                    | 17             |
| III.3 (proband)                   | 265                | 268         | 253                         | 77                                          | 24             | 75                                    | 24             |
| III.4 (sister)                    | 225                | 226         | 221                         | 66                                          | 25             | 66                                    | 25             |
| III.1 (cousin 1)                  | 255                | 257         | 249                         | 95                                          | 28             | 92                                    | 28             |
| III.2 (cousin 2)                  | 67                 | 68          | 67                          | 27                                          | 7              | 27                                    | 7              |
| II.4 (mother)                     | 226                | 227         | 219                         | 80                                          | 19             | 79                                    | 18             |
| <b>Total</b>                      | <b>1175</b>        | <b>1186</b> | <b>1144</b>                 | <b>382</b>                                  | <b>120</b>     | <b>376</b>                            | <b>119</b>     |
| <b>TTEST (p)</b>                  |                    |             |                             | <b>0.72</b>                                 | <b>0.90</b>    | <b>0.71</b>                           | <b>0.87</b>    |

The number of observed sequence variants in genes known to interact with UBC were compared between family members with the ability to backward-speak (II.3 (father) and II.3 (proband)) and those family members without the ability (III.4, III.1, III.2, II.4). No significant differences in variant burden were observed across groups.
